# Supplementary material for: Beneath the surface: A survey evaluating ASF preparedness across the Caribbean and Latin America
Source: Research Square preprint supplement (doi:10.21203/rs.3.rs-8262911/v1), 2026-02-03
Supplement: Supplementary file 1 [file 2bfe8f21d3cbdcb69d182fae.xlsx]

## Sheet: Sheet1
Statement	Statement Details
No.	Short label	Domain	Full statement
1	Staffing	Resources / Coordination / Operativity	There is sufficient staff at the national level (central, regional, and local) to carry out prevention and response activities for ASF, and the personnel are trained and qualified.
2	Funding	Resources / Coordination / Operativity	There are sufficient funds available to carry out prevention, detection, notification, and mitigation measures.
3	Coordination	Resources / Coordination / Operativity	There is good communication and predefined coordination mechanisms for public-private partnerships and within the government (border control, etc.) to support detection and response.
4	Legislation	Resources / Coordination / Operativity	There is a legislative framework that grants sufficient authority to the veterinary authority to enact the required measures and provide adequate support.
5	Industry	Resources / Coordination / Operativity	The private pig industry is positive and receptive to the ASF control measures enacted by the Veterinary Authority.
6	Producer categories	Susceptible Population	Pig producers are classified into categories (e.g., highly technical commercial, small commercial, subsistence) based on defined criteria.
7	Producer registry	Susceptible Population	Commercial pig producers are registered, and their location and pig stocks are known.
8	Movements studied	Susceptible Population	Pig movement patterns have been studied and characterized.
9	Backyard pop. profiled	Susceptible Population	The backyard pig population (number and geographical distribution) has been studied and characterized.
10	Wild pigs profiled	Susceptible Population	The population of wild boars and feral pigs in the country has been studied and characterized.
11	Formal slaughter & inspection	Pig Health & ASF Program	Pigs are slaughtered in formal slaughterhouses with official inspection. Inspectors are well-qualified to identify and detect the disease.
12	Traceability	Pig Health & ASF Program	There is a traceability system that allows for forward and backward tracking of live pigs, pork products, and germplasm.
13	Disease regulations	Pig Health & ASF Program	There are existing regulations aimed at preventing/controlling pig diseases, such as the prohibition of feeding pigs raw waste, the prohibition of bringing raw pork products into the country in luggage, mandatory washing/disinfection of live pig transport trucks, etc.
14	NGO collaboration	Pig Health & ASF Program	Non-governmental institutions or groups collaborate with the government to support the pig production sector.
15	National ASF plan	Pig Health & ASF Program	There is a national ASF prevention/control plan. There is a national focal point dedicated to ASF and a national committee or working group on the disease, made up of trained and qualified individuals to create and carry out ASF response measures.
16	Risk analysis & mitigation	Pig Health & ASF Program	A risk analysis has been carried out for the country, high-risk pathways have been identified, and mitigation measures have been designed and implemented based on this analysis.
17	Contingency drill	Pig Health & ASF Program	A contingency plan exists to respond to an ASF emergency, which has been tested in at least one simulation exercise.
18	Passive surveillance	Pig Health & ASF Program	Appropriate passive surveillance is carried out, including the collection and sending of suitable samples. When responding, the number of reported suspicions, the samples collected, the availability of diagnostic material, trained personnel, and the possibility of performing differential diagnoses must be considered.
19	Wildlife surveillance	Pig Health & ASF Program	Surveillance activities regularly include the country's wild boar and feral pig populations.
20	Lab capacity	Pig Health & ASF Program	The diagnostic laboratory is well-equipped, the staff is trained, and there are sufficient funds to support early detection and subsequent containment.
21	Risk-based surveillance	Pig Health & ASF Program	High-risk populations are identified, and specific, risk-based surveillance is periodically carried out in these populations.
22	Producer communications	Pig Health & ASF Program	A communication plan exists to alert producers about ASF risks and detections.
23	Training & reporting	Pig Health & ASF Program	Farmers and veterinarians (private and public) are well-trained to detect and respond to ASF and commonly report suspicious clinical signs/mortality to the Veterinary Authority for investigation.
24	Diff. diseases absent	Pig Health & ASF Program	Other pig diseases that are differential diagnoses for ASF are not present in the country.
25	Traveler communications	Pig Health & ASF Program	A communication plan is in place and used to alert travelers about the risks of ASF introduction.
26	IPC supplies & procedures	Pig Health & ASF Program	There are sufficient supplies and resources for the personnel investigating outbreaks and conducting surveillance to achieve proper disinfection and biosecurity between farms. Procedures are described and followed to prevent the spread between farms where outbreaks occur.
27	Biosecurity common	Pig Health & ASF Program	Biosecurity practices are common. The industry is organized and professional.
28	Swill/food regs	Pig Health & ASF Program	In the country, feeding pigs with waste is not practiced and/or there are specific regulations for food treatment. Farms using trucks to transport food adequately disinfect and wash the trucks before they enter the farm.
29	Confinement/fencing	Pig Health & ASF Program	Farms are mainly confinement operations, and free-range pig farming is not allowed. Backyard pigs are adequately contained with fencing.
30	VS reporting system	Pig Health & ASF Program	The Veterinary Services operates a system to collect information on outbreaks and produce timely reports and alerts on reportable and significant diseases, and disease reports and alerts are made available to the public.
