# Supplementary material for: Beneath the surface: A survey evaluating ASF preparedness across the Caribbean and Latin America
Source: Research Square preprint supplement (doi:10.21203/rs.3.rs-8262911/v1), 2026-02-03
Supplement: Supplementary file 2 [file 5eb825a47e85faf9bef90117.xlsx]

## Sheet: Communication and Coordination
SUBTHEME	CODE	TERRITORY	COMMENT
Disease alerts and reports	Communication system not in place	4	We can get the message across in case of an event, but there is no formal plan.
Disease alerts and reports	Communication system not in place	13	There were actions when the DR outbreak occurred, but it is not active anymore
Disease alerts and reports	Communication system not in place	13	It has been done before for animal diseases including public statements. Communications are included in the regulations.
Disease alerts and reports	Communication system not in place	15	No official reporting system or alerts available.
Disease alerts and reports	Communication system not in place	15	No formal communication strategy in place.
Disease alerts and reports	Communication system not in place	16	In progress
Disease alerts and reports	Communication system not in place	18	Currently, there is no communication plan in place, although there are future plans to establish one.
Disease alerts and reports	Communication system not in place	18	Efforts are made to inform producers; however, information often is overlooked, forgotten, or insufficiently disseminated.
Disease alerts and reports	Communication system not in place	18	No traveler-focused communication plan currently exists.
Disease alerts and reports	Communication system not in place	18	There is no operational system to gather or disseminate disease outbreak information. Efforts to establish such a system are currently underway.
Disease alerts and reports	Reported to public	5	If there is any outbreak or concern, the Vet Services would produce monthly reports. We don't collect the information. More a sort of passive information gathering.
Disease alerts and reports	Reported to public	5	There is a dept dedicated Facebook page, there is a media communications team.
Disease alerts and reports	Reported to public	5	Through the media
Disease alerts and reports	Reported to public	6	Registered producers, mainly in the commercial pig sector, are notified directly.
Disease alerts and reports	Reported to public	10	There is no specific communication plan for PPA, but channels used for other diseases are used.
Disease alerts and reports	Reported to public	10	Depending on the target audience, social media, radio, television, press releases and even foot visits in communities with less connectivity are used. The strategy is adapted according to the needs and the audience.
Disease alerts and reports	Reported to public	10	There is a well-defined chain of command. Only authorized persons can share information to ensure the veracity of the message. Internal reports are produced weekly and monthly, and WOAH is notified every six months. Press releases are issued when necessary. [animal health authority] generally coordinates with the [government] to disseminate information to the public.
Disease alerts and reports	Reported to public	11	Weekly epidemiological bulletin, publicly accessible, for relevant diseases (includes both plagues)
Disease alerts and reports	Reported to public	13	It has been done before for animal diseases including public statements. Communications are included in the regulations.
Disease alerts and reports	Reported to public	13	There is no offical plan, but CVO has materials to share with farmers.
Disease alerts and reports	Reported within government	4	If there is any outbreak or concern, the Vet Services would produce monthly reports. We don't collect the information. More a sort of passive information gathering.
Disease alerts and reports	Reported within government	6	There is a system for reporting outbreaks and illnesses, but the information is not publicly available.
Disease alerts and reports	Reported within government	8	The information is available, however, it is not made available to the public.
Disease alerts and reports	Reported within government	9	They have a system that records surveillance activities and notifications. The data is available to officials, but is not made public.
Disease alerts and reports	Reported within government	10	There is a well-defined chain of command. Only authorized persons can share information to ensure the veracity of the message. Internal reports are produced weekly and monthly, and WOAH is notified every six months. Press releases are issued when necessary. [animal health authority] generally coordinates with the [government] to disseminate information to the public.
Disease alerts and reports	Reported within government	10	Passive surveillance is in place: when swine health problems are reported, samples are taken and analysed for ASF and CSF. A diagnostic laboratory and trained personnel are available in [territory]. The frequency of notifications varies (about once a month, sometimes more). Sometimes other problems unrelated to ASF are detected. This surveillance allows for early detection of suspicious signs.
Disease alerts and reports	Reported within government	12	Detected cases are recorded. It is not publicly accessible.
Disease alerts and reports	Reports to travelers	5	There information in the FB page.
Disease alerts and reports	Reports to travelers	6	Actions are limited to the distribution of leaflets in agricultural quarantine zones.
Disease alerts and reports	Reports to travelers	10	Communication exists at points of entry (airports) where meat-sniffing dogs are used. However, entry areas are largely privatised, and outside quarantine-controlled areas, communication is less consistent.
Disease alerts and reports	Reports to travelers	14	Fliers and announcements on the radios, not specific but in general if something is identified as a ntional threat.
Disease alerts and reports	Reports to travelers	15	Minimal signage at borders only during nearby outbreaks.
Disease alerts and reports	Reports to travelers	17	No consistent regulation; signage is informally used during ASF outbreaks in the Dominican Republic to discourage travelers from bringing pork into the country.
Government and private sector communication/coordination	Good gov't, private sector communication and coordination	3	Working group on swine health, made up of different sectors
Government and private sector communication/coordination	Good gov't, private sector communication and coordination	4	Industryu seems receptive to ASF related activities
Government and private sector communication/coordination	Good gov't, private sector communication and coordination	4	Vet has been trained. Farmers are likely to report to vet services.
Government and private sector communication/coordination	Good gov't, private sector communication and coordination	5	There is a dept dedicated Facebook page, there is a media communications team.
Government and private sector communication/coordination	Good gov't, private sector communication and coordination	5	Mainly with [university], no local pig association.
Government and private sector communication/coordination	Good gov't, private sector communication and coordination	6	Registered producers, mainly in the commercial pig sector, are notified directly.
Government and private sector communication/coordination	Good gov't, private sector communication and coordination	8	The private sector collaborates strongly with the public sector.
Government and private sector communication/coordination	Good gov't, private sector communication and coordination	10	Although there were initial disagreements, education and awareness raising have improved the attitude of producers towards surveillance and prevention measures. Commercial producers are more receptive; however, the backyard sector presents greater difficulties, especially in indigenous communities in southern [territory] where pigs are raised free-range. Greater support from the [agriculture depa…
Government and private sector communication/coordination	Good gov't, private sector communication and coordination	10	The swine industry has a [pork association] and has participated in the [territory] Livestock Association. There are about 50 commercial producers out of a membership of approximately 6,000 in the livestock association, but many are not exclusively dedicated to swine farming. Joint workshops have been held with the [agriculture department] and producers, including with other countries, to address…
Government and private sector communication/coordination	Good gov't, private sector communication and coordination	13	Always willing to receive help from the authority.
Government and private sector communication/coordination	Good gov't, private sector communication and coordination	16	Open to discussion and implementing measures, but measures not in place yet
Government and private sector communication/coordination	Good gov't, private sector communication and coordination	16	Farmer's association - all farmer's are supposed to be involved in it
Government and private sector communication/coordination	Gov't, private sector communication/coordination needs improvement	2	We don't reach the backyard ones
Government and private sector communication/coordination	Gov't, private sector communication/coordination needs improvement	2	Stakeholders are not involved in drafting resolutions
Government and private sector communication/coordination	Gov't, private sector communication/coordination needs improvement	4	We can get the message across in case of an event, but there is no formal plan.
Government and private sector communication/coordination	Gov't, private sector communication/coordination needs improvement	4	Nothing specific to pig production
Government and private sector communication/coordination	Gov't, private sector communication/coordination needs improvement	5	Still challenges with producers
Government and private sector communication/coordination	Gov't, private sector communication/coordination needs improvement	5	farmers are harder to get
Government and private sector communication/coordination	Gov't, private sector communication/coordination needs improvement	6	Although there is communication with the veterinary authority, some producers are reluctant to report suspected cases.
Government and private sector communication/coordination	Gov't, private sector communication/coordination needs improvement	6	Although clinical signs are understood, fear of reporting persists.
Government and private sector communication/coordination	Gov't, private sector communication/coordination needs improvement	6	There are few private veterinarians in the country. Although some producers report suspected cases, most do not.
Government and private sector communication/coordination	Gov't, private sector communication/coordination needs improvement	10	Although there were initial disagreements, education and awareness raising have improved the attitude of producers towards surveillance and prevention measures. Commercial producers are more receptive; however, the backyard sector presents greater difficulties, especially in indigenous communities in southern [territory] where pigs are raised free-range. Greater support from the [agriculture depa…
Government and private sector communication/coordination	Gov't, private sector communication/coordination needs improvement	10	There is no specific communication plan for PPA, but channels used for other diseases are used.
Government and private sector communication/coordination	Gov't, private sector communication/coordination needs improvement	11	Coordination with [health department] is ok. There are 3 pig associations with which it is difficult to coordinate (there are clashes between them)
Government and private sector communication/coordination	Gov't, private sector communication/coordination needs improvement	12	Notification needs to be improved. By suspending compensation, reporting was significantly reduced.
Government and private sector communication/coordination	Gov't, private sector communication/coordination needs improvement	13	There is no offical plan, but CVO has materials to share with farmers.
Government and private sector communication/coordination	Gov't, private sector communication/coordination needs improvement	13	There is a farmers association. There are not so pig oriented.
Government and private sector communication/coordination	Gov't, private sector communication/coordination needs improvement	14	The participation of NGOs or non-governmental entities in direct support of pig farming is limited. More projects and aid have been seen for the bovine sector. Some international collaborations with Mexico have existed, but support for the pig sector is scarce.
Government and private sector communication/coordination	Gov't, private sector communication/coordination needs improvement	15	No formal coordination
Government and private sector communication/coordination	Gov't, private sector communication/coordination needs improvement	15	There is no communication with the industry
Government and private sector communication/coordination	Gov't, private sector communication/coordination needs improvement	15	No formal communication strategy in place.
Government and private sector communication/coordination	Gov't, private sector communication/coordination needs improvement	15	The veterinary consultant and other veterinarians in the country try to collaborate with the government to support the pig sector, although it is nearly nonexistent.
Government and private sector communication/coordination	Gov't, private sector communication/coordination needs improvement	16	Open to discussion and implementing measures, but measures not in place yet
Government and private sector communication/coordination	Gov't, private sector communication/coordination needs improvement	18	Communication between government entities and private farmers is limited. Farmers often expect the government to handle all responsibilities and are reluctant to share farm information, weakening coordination efforts.
Government and private sector communication/coordination	Gov't, private sector communication/coordination needs improvement	18	Efforts are made to inform producers; however, information often is overlooked, forgotten, or insufficiently disseminated.
Government and private sector communication/coordination	Gov't, private sector communication/coordination needs improvement	18	Registered farmers receive an identification card, allowing them discounts from private businesses for farm-related supplies and services, representing limited collaboration
Government and private sector communication/coordination	Gov't, private sector communication/coordination needs improvement	18	There is no operational system to gather or disseminate disease outbreak information. Efforts to establish such a system are currently underway.
Government IGO and NGO communication/coordination	Good communication and coordination between gov't, IGO, NGO	2	international organizations and the chamber of commercial pig producers
Government IGO and NGO communication/coordination	Good communication and coordination between gov't, IGO, NGO	4	There is a comms unit at the department that coordinates local and federal comms
Government IGO and NGO communication/coordination	Good communication and coordination between gov't, IGO, NGO	5	There are good communication with instututions, but farmers are harder to get
Government IGO and NGO communication/coordination	Good communication and coordination between gov't, IGO, NGO	6	FAO has supported improved reporting and access to information.
Government IGO and NGO communication/coordination	Good communication and coordination between gov't, IGO, NGO	6	There is interaction with organisations through open communication channels. Surveillance plans are coordinated, including mandatory reporting, and agricultural organisations are actively involved in the response.
Government IGO and NGO communication/coordination	Good communication and coordination between gov't, IGO, NGO	6	FAO, OIRSA and USAID provide financial support, training and monitoring to the swine sector.
Government IGO and NGO communication/coordination	Good communication and coordination between gov't, IGO, NGO	7	Mainly from international organizations such as OIRSA and FAO
Government IGO and NGO communication/coordination	Good communication and coordination between gov't, IGO, NGO	8	The private sector collaborates strongly with the public sector.
Government IGO and NGO communication/coordination	Good communication and coordination between gov't, IGO, NGO	9	OIRSA, FAO
Government IGO and NGO communication/coordination	Good communication and coordination between gov't, IGO, NGO	10	[Animal health authority], as a statutory body independent of the [agriculture department], coordinates with its four departments (Animal Health, Plant Health, Food Safety and Quarantine). There is good relationship and coordination between the various government institutions, as well as increasingly effective communication with producers. The swine industry has a “Pork Consulate” and has partici…
Government IGO and NGO communication/coordination	Good communication and coordination between gov't, IGO, NGO	11	FAO, OIRSA, IICA, private sector
Government IGO and NGO communication/coordination	Good communication and coordination between gov't, IGO, NGO	12	Limited to international organizations FAO, IICA, USDA-APHIS, OIRSA
Government IGO and NGO communication/coordination	Good communication and coordination between gov't, IGO, NGO	13	Comms with customs. Comms are good.
Government IGO and NGO communication/coordination	Good communication and coordination between gov't, IGO, NGO	14	Good relationship with customs, they notify the team, for example pork from the DR
Government IGO and NGO communication/coordination	Good communication and coordination between gov't, IGO, NGO	17	Good communications, but there are challenges in the intergovermental coordination.
Government IGO and NGO communication/coordination	Gov't, IGO, NGO communication/coordination needs improvement	1	Some difficulty in coordinating with customs authorities.
Government IGO and NGO communication/coordination	Gov't, IGO, NGO communication/coordination needs improvement	2	There are links, but not formal ones
Government IGO and NGO communication/coordination	Gov't, IGO, NGO communication/coordination needs improvement	4	Nothing specific to pig production
Government IGO and NGO communication/coordination	Gov't, IGO, NGO communication/coordination needs improvement	5	Mainly with [university], no local pig association.
Government IGO and NGO communication/coordination	Gov't, IGO, NGO communication/coordination needs improvement	6	Actions are limited to the distribution of leaflets in agricultural quarantine zones.
Government IGO and NGO communication/coordination	Gov't, IGO, NGO communication/coordination needs improvement	10	The participation of NGOs or non-governmental entities in direct support of pig farming is limited. More projects and aid have been seen for the bovine sector. Some international collaborations with Mexico have existed, but support for the pig sector is scarce.
Government IGO and NGO communication/coordination	Gov't, IGO, NGO communication/coordination needs improvement	10	Communication exists at points of entry (airports) where meat-sniffing dogs are used. However, entry areas are largely privatised, and outside quarantine-controlled areas, communication is less consistent.
Government IGO and NGO communication/coordination	Gov't, IGO, NGO communication/coordination needs improvement	11	Coordination with [health authority] is ok. There are 3 pig associations with which it is difficult to coordinate (there are clashes between them)
Government IGO and NGO communication/coordination	Gov't, IGO, NGO communication/coordination needs improvement	13	There is a farmers association. There are not so pig oriented.
Government IGO and NGO communication/coordination	Gov't, IGO, NGO communication/coordination needs improvement	13	There were actions when the DR outbreak occurred, but it is not active anymore
Government IGO and NGO communication/coordination	Gov't, IGO, NGO communication/coordination needs improvement	15	The veterinary consultant and other veterinarians in the country try to collaborate with the government to support the pig sector, although it is nearly nonexistent.
Government IGO and NGO communication/coordination	Gov't, IGO, NGO communication/coordination needs improvement	15	No formal coordination
Government IGO and NGO communication/coordination	Gov't, IGO, NGO communication/coordination needs improvement	15	Minimal signage at borders only during nearby outbreaks.
Government IGO and NGO communication/coordination	Gov't, IGO, NGO communication/coordination needs improvement	16	In process
Government IGO and NGO communication/coordination	Gov't, IGO, NGO communication/coordination needs improvement	16	Farmer's association - all farmer's are supposed to be involved in it
Government IGO and NGO communication/coordination	Gov't, IGO, NGO communication/coordination needs improvement	16	In progress
Government IGO and NGO communication/coordination	Gov't, IGO, NGO communication/coordination needs improvement	17	Good communications, but there are challenges in the intergovermental coordination.

## Sheet: Pig Production Systems
SUBTHEME	CODE	TERRITORY	COMMENT
Disease control measures and biosecurity	Adequate dz control and bio	2	on medium and large farms
Disease control measures and biosecurity	Adequate dz control and bio	5	Abattori trucks are disinfected, also trucks of larger companies are disinfected too.
Disease control measures and biosecurity	Adequate dz control and bio	5	general pig health programs are in place
Disease control measures and biosecurity	Adequate dz control and bio	6	Most backyard pigs are confined in small pens, following regulations related to human and environmental health.
Disease control measures and biosecurity	Adequate dz control and bio	10	There are regulations issued by [animal health association] (Swine Fever Regulations) that prohibit the feeding of raw waste. At points of entry into the territory, non-permitted products are quarantined, confiscated and destroyed. Howe
Disease control measures and biosecurity	Adequate dz control and bio	10	Regulations prohibit feeding raw feed to pigs. Commercial operations use formulated feed and trucks are not allowed on the premises. Producers pick up feed at the farm gate.
Disease control measures and biosecurity	Adequate dz control and bio	13	Pig operations are all confined.
Disease control measures and biosecurity	Adequate dz control and bio	14	Instalations are rusty and old, but pigs are always confined. There are no free range operations
Disease control measures and biosecurity	Adequate dz control and bio	17	Animals move in their confined area, they are not open to roam freely
Disease control measures and biosecurity	Adequate dz control and bio	18	Current measures, including inspections at airports and seaports, particularly from the Dominican Republic, have been effective, carried out by trained personnel.
Disease control measures and biosecurity	Dz control and bio needs improvement	2	on medium and large farms
Disease control measures and biosecurity	Dz control and bio needs improvement	2	There are indigenous areas that raise pigs in freedom (limited)
Disease control measures and biosecurity	Dz control and bio needs improvement	3	Biosecurity is not mandatory.
Disease control measures and biosecurity	Dz control and bio needs improvement	5	Most farms have contained pigs
Disease control measures and biosecurity	Dz control and bio needs improvement	5	Still challenges with producers
Disease control measures and biosecurity	Dz control and bio needs improvement	6	Some of the sector invests in biosecurity, while others have limited interest.
Disease control measures and biosecurity	Dz control and bio needs improvement	6	Approximately 50% of the sector practices biosecurity. Financial and infrastructural challenges limit its widespread adoption.
Disease control measures and biosecurity	Dz control and bio needs improvement	6	These practices are common in high-tech commercial operations, but not in backyard producers.
Disease control measures and biosecurity	Dz control and bio needs improvement	8	Although backyards are the minority, they are generally found loose.
Disease control measures and biosecurity	Dz control and bio needs improvement	10	There are biosecurity measures in place on commercial farms that can be improved. Approximately 60-70% of commercial operations maintain acceptable biosecurity practices. The organization and professionalization of the industry is increasing, although there is still room for improvement.
Disease control measures and biosecurity	Dz control and bio needs improvement	10	This varies from region to region. In the [territory region] district, for example, backyard pigs roam free. In other areas, fences are used. There is no uniform control throughout the territory.
Disease control measures and biosecurity	Dz control and bio needs improvement	12	There are still pigs in garbage dumps, in small proportions
Disease control measures and biosecurity	Dz control and bio needs improvement	13	They are not organized nor professional.
Disease control measures and biosecurity	Dz control and bio needs improvement	13	There are no feed regulations.
Disease control measures and biosecurity	Dz control and bio needs improvement	14	They do use trucks and no disinfection. They use carrots, grain. Also have access to restaurants, cafeteria.
Disease control measures and biosecurity	Dz control and bio needs improvement	15	Biosecurity practices not standardized.
Disease control measures and biosecurity	Dz control and bio needs improvement	15	No regulation on waste feeding or truck disinfection.
Disease control measures and biosecurity	Dz control and bio needs improvement	15	Most pigs are free-range; no fencing standards.
Disease control measures and biosecurity	Dz control and bio needs improvement	16	2/3 of farms are confinement, but no legislation on free-range farming is in place
Disease control measures and biosecurity	Dz control and bio needs improvement	17	There is a Dept. for Hygene - they work with restaurants. Not a lot done with farmers, the focus is more into the butcher station.
Disease control measures and biosecurity	Dz control and bio needs improvement	18	Biosecurity measures are virtually nonexistent on farms. Although improvements in farm organization and infrastructure are gradually occurring, overall biosecurity remains poor.
Disease control measures and biosecurity	Dz control and bio needs improvement	18	Regulations for waste feeding and mandatory truck cleaning are absent, and no standard practices currently exist regarding waste feed prevention or truck sanitation.
Disease control measures and biosecurity	Dz control and bio needs improvement	18	Confinement practices are generally lacking. Backyard pigs frequently roam freely, indicating inadequate fencing and containment practices across farms.
Feral Pigs	None	7	There are no wild boars
Feral Pigs	None	8	There are no wild boars, there are no feral ones. Pecc
Feral Pigs	None	9	There is none
Feral Pigs	None	11	We don't have
Feral Pigs	None	11	We don't have
Feral Pigs	None	13	There are no wild boar or feral pigs
Feral Pigs	None	17	No feral pigs
Feral Pigs	Pop characterized	1	There are no wild boars. They have studied the behavior and distribution of feral pigs
Feral Pigs	Pop characterized	2	only on [island]
Feral Pigs	Pop characterized	3	Feral pigs are limited in the northern states. There are no wild boars in the wild.
Feral Pigs	Pop characterized	5	Only feral pigs, there are known areas where feral pig lives and a feral animal control program
Feral Pigs	Pop characterized	12	Only wild pigs. Their distribution has not been studied, but it is known that there are not many of them.
Feral Pigs	Pop not characterized	2	only on [island]
Feral Pigs	Pop not characterized	4	Not studied. Some hunters go for them.
Feral Pigs	Pop not characterized	6	There is no data available on the existence of feral pigs or wild boars in the territory. This issue is the responsibility of the [goverment organization].
Feral Pigs	Pop not characterized	6	This issue is under the jurisdiction of the [goverment organization], but no recent requests for monitoring have been made.
Feral Pigs	Pop not characterized	8	There are peccaries, more information is needed.
Feral Pigs	Pop not characterized	10	There is no systematic information on wild boars or feral pigs. There are only references to the “peccary”, and these studies are usually carried out through NGOs and projects on sustainable resources and climate change.
Feral Pigs	Pop not characterized	10	There is some passive and sporadic surveillance through NGOs and in zoo areas where there are peccaries. However, there is no regular and systematic program focused on wild populations.
Feral Pigs	Pop not characterized	12	Only wild pigs. Their distribution has not been studied, but it is known that there are not many of them.
Feral Pigs	Pop not characterized	14	large wild ppn in the exclusion zone
Feral Pigs	Pop not characterized	14	not studied
Feral Pigs	Pop not characterized	14	Nothing in the last 10 years, at least for pigs
Feral Pigs	Pop not characterized	15	No wild population assessment available.
Feral Pigs	Pop not characterized	15	Wild boar surveillance not conducted.
Feral Pigs	Pop not characterized	17	There is no surveillance and no feral suids
Feral Pigs	Pop not characterized	18	Wild pig populations exist due to escaped domesticated pigs, but no formal studies or population estimates are available.
Feral Pigs	Pop not characterized	18	No surveillance activities are conducted for wild pig populations.
Movement Patterns	Not well characterized	2	There are indigenous areas that raise pigs in freedom (limited)
Movement Patterns	Not well characterized	4	They usually move from farm to abattoir, sometimes will move the sows for breeding. Also trade among farms.
Movement Patterns	Not well characterized	5	To some extent there has been studied. Minimal formal research though.
Movement Patterns	Not well characterized	5	Most farms have contained pigs
Movement Patterns	Not well characterized	6	These practices are common in high-tech commercial operations, but not in backyard producers.
Movement Patterns	Not well characterized	6	Most backyard pigs are confined in small pens, following regulations related to human and environmental health.
Movement Patterns	Not well characterized	8	Although backyards are the minority, they are generally found loose.
Movement Patterns	Not well characterized	12	There are still pigs in garbage dumps, in small proportions
Movement Patterns	Not well characterized	13	have not been studied but we know about them.
Movement Patterns	Not well characterized	15	Movement not studied; very limited movement between farmers
Movement Patterns	Not well characterized	15	Most pigs are free-range; no fencing standards.
Movement Patterns	Not well characterized	16	So informal it is difficult to characterize
Movement Patterns	Not well characterized	17	Not to her knowledge
Movement Patterns	Not well characterized	17	Everyone has pigs as a side bussines.
Movement Patterns	Not well characterized	17	Animals move in their confined area, they are not open to roam freely
Movement Patterns	Not well characterized	18	Pig movements between farms are neither recorded nor studied. Information is available only at slaughterhouses regarding the origin of pigs arriving for slaughter.
Movement Patterns	Not well characterized	18	Confinement practices are generally lacking. Backyard pigs frequently roam freely, indicating inadequate fencing and containment practices across farms.
Movement Patterns	Well characterized	1	To move animals, a mobilization guide is required.
Movement Patterns	Well characterized	6	Commercial pig movement patterns are well defined, but there is insufficient information on backyard or subsistence pigs.
Movement Patterns	Well characterized	8	Yes, they have maps of the flow of pig movement.
Movement Patterns	Well characterized	10	Studies have been conducted, the most recent in 2020, which allow us to understand movement patterns. Currently, there are new regulations that facilitate inspection and control of movement between districts, implemented for about a month now. There is a clear understanding of how animals are moved within the territory.
Movement Patterns	Well characterized	17	Animals move in their confined area, they are not open to roam freely
Prod system not well characterized	Backyard pigs	4	No formal documentation of this.
Prod system not well characterized	Backyard pigs	6	There is no defined criterion. Backyard pigs predominate due to the distribution of the population. The last census was in 2008, and another is expected to be carried out next year.
Prod system not well characterized	Backyard pigs	6	there is insufficient information on backyard or subsistence pigs. Informal markets and clandestine slaughterhouses are recurring challenges.
Prod system not well characterized	Backyard pigs	6	In 2022, a survey of backyard pigs was carried out, but the data has not been updated. The population fluctuates constantly, making it difficult to characterize.
Prod system not well characterized	Backyard pigs	6	Commercial pig movement patterns are well defined, but there is insufficient information on backyard or subsistence pigs. Info
Prod system not well characterized	Backyard pigs	8	There are two classifications: farms (technical) and backyard animals, but there are no regulations for this.
Prod system not well characterized	Backyard pigs	8	It has been studied, it lacks characterization.
Prod system not well characterized	Backyard pigs	9	last census in 2012
Prod system not well characterized	Backyard pigs	10	It is estimated that around 70% of the backyard population is known, which allows for a clearer idea of ​​the distribution and number of animals per community, farm and family in each district.
Prod system not well characterized	Backyard pigs	12	There are still pigs in garbage dumps, in small proportions
Prod system not well characterized	Backyard pigs	13	Working on that, based on number of sows and piglets
Prod system not well characterized	Backyard pigs	14	Underestimation - informal classification is still some classification
Prod system not well characterized	Backyard pigs	14	about 10 producers, not studied
Prod system not well characterized	Backyard pigs	15	Farms not registered; only four known farms.
Prod system not well characterized	Backyard pigs	15	No studies conducted; production is unregulated.
Prod system not well characterized	Backyard pigs	16	Not registered, but mapping in progress
Prod system not well characterized	Backyard pigs	16	In progress
Prod system not well characterized	Backyard pigs	16	All subsistence farming, no definition
Prod system not well characterized	Backyard pigs	17	No
Prod system not well characterized	Backyard pigs	17	There is a farm ID system in place, but it is not enforced.
Prod system not well characterized	Backyard pigs	17	Not to her knowledge. There isa vague idea of the total (small) pig populations
Prod system not well characterized	Backyard pigs	18	Backyard pig population data is only available from farms that have voluntarily registered. Comprehensive characterization has not been conducted.
Prod system not well characterized	Commercial pigs	4	No formal documentation of this.
Prod system not well characterized	Commercial pigs	4	Lacking a formal database
Prod system not well characterized	Commercial pigs	6	There is no defined criterion. Backyard pigs predominate due to the distribution of the population. The last census was in 2008, and another is expected to be carried out next year.
Prod system not well characterized	Commercial pigs	8	There are two classifications: farms (technical) and backyard animals, but there are no regulations for this.
Prod system not well characterized	Commercial pigs	13	Working on that, based on number of sows and piglets
Prod system not well characterized	Commercial pigs	14	Underestimation - informal classification is still some classification
Prod system not well characterized	Commercial pigs	14	no commercial
Prod system not well characterized	Commercial pigs	15	Farms not registered; only four known farms.
Prod system not well characterized	Commercial pigs	16	Not registered, but mapping in progress
Prod system not well characterized	Commercial pigs	17	No
Prod system not well characterized	Commercial pigs	17	There is a farm ID system in place, but it is not enforced.
Prod system not well characterized	Commercial pigs	18	However, compliance is inconsistent, and many farmers register only when needing government assistance.
Prod system well characterized	Backyard pigs	1	5 categories, depending on the number of fattening pigs or the number of mother sows
Prod system well characterized	Backyard pigs	5	Based on numbers, yes
Prod system well characterized	Backyard pigs	7	3 categories: backyard <25; artisanal farms: 25 to 100; semi-technified farms: 100 to 500; commercial farms: >500
Prod system well characterized	Backyard pigs	7	80% were backyard pigs in the 2008 census
Prod system well characterized	Backyard pigs	9	technified, semi-technical and backyard
Prod system well characterized	Backyard pigs	10	In [territory], there are two main categories: backyard and commercial. Backyard producers raise pigs for family or community consumption, while commercial producers produce for the formal market (slaughterhouses, butcher shops, packing plants). This classification is based on the type of farm and the destination of the production.
Prod system well characterized	Backyard pigs	10	Typically, local authorities (mayors, community leaders) and extension workers work together to identify households that breed various species. Through active surveillance, high-risk communities are targeted, especially in border areas with [territory]. It is estimated that around 70% of the backyard population is known, which allows for a clearer idea of ​​the distribution and number of animals …
Prod system well characterized	Backyard pigs	18	Registration is legally required for all farms, including location and livestock type
Prod system well characterized	Commercial pigs	1	5 categories, depending on the number of fattening pigs or the number of mother sows
Prod system well characterized	Commercial pigs	5	Based on numbers, yes
Prod system well characterized	Commercial pigs	6	Commercial producers are registered and maintain a database that includes pig locations and inventories.
Prod system well characterized	Commercial pigs	7	3 categories: backyard <25; artisanal farms: 25 to 100; semi-technified farms: 100 to 500; commercial farms: >500
Prod system well characterized	Commercial pigs	10	In [territory], there are two main categories: backyard and commercial. Backyard producers raise pigs for family or community consumption, while commercial producers produce for the formal market (slaughterhouses, butcher shops, packing plants). This classification is based on the type of farm and the destination of the production.
Prod system well characterized	Commercial pigs	10	There is a food safety system and a business register that provides information on the location of commercial producers. The last official census was conducted in 2023. Most commercial producers participate in this type of register.
Prod system well characterized	Commercial pigs	12	technified, semi-technical and backyard
Prod system well characterized	Commercial pigs	13	All are registered.
Prod system well characterized	Commercial pigs	18	Registration is legally required for all farms, including location and livestock type
Training of farmers	Need more training and underreporting	2	underreporting
Training of farmers	Need more training and underreporting	6	Although there is communication with the veterinary authority, some producers are reluctant to report suspected cases.
Training of farmers	Need more training and underreporting	6	Although clinical signs are understood, fear of reporting persists.
Training of farmers	Need more training and underreporting	6	Although some producers report suspected cases, most do not.
Training of farmers	Need more training and underreporting	10	Although there were initial disagreements, education and awareness raising have improved the attitude of producers towards surveillance and prevention measures. Commercial producers are more receptive; however, the backyard sector presents greater difficulties, especially in indigenous communities in southern [territory] where pigs are raised free-range. Greater support from the [goverment organi…
Training of farmers	Need more training and underreporting	12	Notification needs to be improved. By suspending compensation, reporting was significantly reduced.
Training of farmers	Need more training and underreporting	13	The CVO is trained, reporting will be back to the VO in the [territory]. There is room for more training for stakeholders.
Training of farmers	Need more training and underreporting	15	Inexistent
Training of farmers	Need more training and underreporting	16	Vets are trained, farmers are not
Training of farmers	Need more training and underreporting	17	The 2 vets are well trainers, but the is incertainty about the how much knowledge faremrs have
Training of farmers	Need more training and underreporting	18	while farmer training is minimal. However, farmers tend to report unusual observations.
Training of farmers	Well trained	4	Vet has been trained. Farmers are likely to report to vet services.
Training of farmers	Well trained	5	Vet services receive calls from farmers when something looks oddd.
Training of farmers	Well trained	10	There are few private veterinarians (about 2 consultants) working with the livestock sector. In the public sector, about 4 [animal health association] veterinarians cover the field. Most producers know that they should report suspicious clinical signs or increased mortality. Ho
Training of farmers	Well trained	10	The swine industry has a “Pork Consulate” and has participated in the [animal health association]. There are about 50 commercial producers out of a membership of approximately 6,000 in the livestock association, but many are not exclusively dedicated to swine farming. Joint workshops have been held with the [goverment organization] and producers, including with other countries (e.g. [territory]),…
Training of farmers	Well trained	10	Although there were initial disagreements, education and awareness raising have improved the attitude of producers towards surveillance and prevention measures. Commercial producers are more receptive; however, the backyard sector presents greater difficulties, especially in indigenous communities in southern [territory] where pigs are raised free-range. Greater support from the [goverment organi…
Training of farmers	Well trained	14	The vets know. Farmers tend to report anything susopicious to the vet authorities.
Training of farmers	Well trained	18	while farmer training is minimal. However, farmers tend to report unusual observations.

## Sheet: Prevention and Control
SUBTHEME	CODE	TERRITORY	COMMENT
Contingency plans	Adequate contingency plan in place	9	2020 pig red disease control plan
Contingency plans	Adequate contingency plan in place	9	[territory]'s contingency plan. OIRSA drill
Contingency plans	Contingency plan needs improving	4	nothing now, but it is on the works (coming soon)
Contingency plans	Contingency plan needs improving	5	Simulation is coming in 2025, first half.
Contingency plans	Contingency plan needs improving	6	There is a plan focused primarily on prevention, passive surveillance and health education, but it lacks integration for a comprehensive response.
Contingency plans	Contingency plan needs improving	8	At least one drill has been carried out. The contingency plan needs to be reviewed/updated.
Contingency plans	Contingency plan needs improving	8	There is a plan, it needs to be reviewed.
Contingency plans	Contingency plan needs improving	10	There has not been a drill in many years and there is no updated contingency plan. If the PPA were to enter today, there would be no immediate operational plan. A plan is planned to be updated in conjunction with OIRSA, but it is not currently in force.
Contingency plans	Contingency plan needs improving	11	drill in 2022
Contingency plans	Contingency plan needs improving	13	Not done yet
Contingency plans	Contingency plan needs improving	13	There was a RA done, but not implementation.
Contingency plans	Contingency plan needs improving	14	No
Contingency plans	Contingency plan needs improving	15	No formal plan or ASF committee exists.
Contingency plans	Contingency plan needs improving	15	No contingency plan tested or in place.
Contingency plans	Contingency plan needs improving	17	No
Contingency plans	Contingency plan needs improving	18	No contingency plan is currently available; measures in place focus solely on prevention.
Prevention	Adequate prevention plan in place	5	Not enough staff, but there is access to material to respond. Prevention measures are in place
Prevention	Adequate prevention plan in place	5	There is a general response plan.
Prevention	Adequate prevention plan in place	9	2020 pig red disease control plan
Prevention	Adequate prevention plan in place	11	After the OIRSA AR, an AR was carried out in [territory], and based on the results, the Prevention Plan was adjusted.
Prevention	Adequate prevention plan in place	11	It is coordinated by the head of the swine program
Prevention	Prevention plan needs improving	2	Higher risk entry routes were identified, but mitigation measures were not implemented
Prevention	Prevention plan needs improving	3	Working group on swine health, made up of different sectors
Prevention	Prevention plan needs improving	4	nothing now, but it is on the works (coming soon)
Prevention	Prevention plan needs improving	5	There is a general response plan.
Prevention	Prevention plan needs improving	5	There has been an internal Risk Analysis, identified risk routes (like planes from DR). Some mitigation measures are in place.
Prevention	Prevention plan needs improving	6	There is a plan focused primarily on prevention, passive surveillance and health education, but it lacks integration for a comprehensive response.
Prevention	Prevention plan needs improving	8	There is a plan, it needs to be reviewed.
Prevention	Prevention plan needs improving	10	A risk analysis was conducted in 2018-2019 and an initial plan was developed based on this. It has not been updated recently. It is considered necessary to review it to improve mitigation measures and expand active surveillance.
Prevention	Prevention plan needs improving	10	There is a national prevention plan that needs updating. There is a national focal point in transition, but there is no specific committee or working group beyond the [animal health authority]. The current plan is old (2020) and needs to be reviewed and modernized.
Prevention	Prevention plan needs improving	13	There is none.
Prevention	Prevention plan needs improving	13	There was a RA done, but not implementation.
Prevention	Prevention plan needs improving	14	Thy are working on one. Not ready yet,. It also includes Avian influenza
Prevention	Prevention plan needs improving	14	There was one for amblyomma ticks,
Prevention	Prevention plan needs improving	15	No formal plan or ASF committee exists.
Prevention	Prevention plan needs improving	15	No formal risk analysis or mitigation planning.
Prevention	Prevention plan needs improving	16	In progress
Prevention	Prevention plan needs improving	17	No
Prevention	Prevention plan needs improving	18	Efforts to develop a comprehensive plan are ongoing. Current measures, including inspections at airports and seaports, particularly from the Dominican Republic, have been effective, carried out by trained personnel.
Prevention	Risk analysis needs updating	6	OIRSA has led some risk analyses, but these activities are still in the early stages.
Prevention	Risk analysis needs updating	8	Pending
Prevention	Risk analysis needs updating	9	have not performed AR
Prevention	Risk analysis needs updating	10	A risk analysis was conducted in 2018-2019 and an initial plan was developed based on this. It has not been updated recently. It is considered necessary to review it to improve mitigation measures and expand active surveillance.
Prevention	Risk analysis needs updating	15	No formal risk analysis or mitigation planning.
Prevention	Risk analysis needs updating	16	In progress
Prevention	Risk analysis needs updating	17	No
Prevention	Risk analysis needs updating	18	No risk analysis has been performed.
Prevention	Risk analysis performed, up-to-date	2	Higher risk entry routes were identified, but mitigation measures were not implemented
Prevention	Risk analysis performed, up-to-date	4	We did an examplary RA in a Workshop in Nov 2023
Prevention	Risk analysis performed, up-to-date	5	There has been an internal Risk Analysis, identified risk routes (like planes from DR). Some mitigation measures are in place.
Prevention	Risk analysis performed, up-to-date	11	After the OIRSA AR, an AR was carried out in [territory], and based on the results, the Prevention Plan was adjusted.
Prevention	Risk analysis performed, up-to-date	13	There was a RA done, but not implementation.
Regulations	Adequate legislative framework	4	Animal health act was passed this year 2024. There is also a Veterinary Act and a Animal Control Act.
Regulations	Adequate legislative framework	5	Airport controls and general pig health programs are in place
Regulations	Adequate legislative framework	6	There is an updated legislative framework that includes measures related to ASF
Regulations	Adequate legislative framework	6	Regulations include a ban on feeding raw waste and import restrictions, but no truck disinfection requirements. There are also quarantine and animal health certification protocols.
Regulations	Adequate legislative framework	10	The legal framework is based on the Act that gave rise to [the animal health authority] in 2000, updated in 2020, and on secondary legal instruments (regulations and bylaws). [The animal health authority] has the authority to regulate and enforce regulations related to PPA and PPC, including the prohibition of feeding raw waste.
Regulations	Adequate legislative framework	10	There are regulations issued by [the animal health authority] (Swine Fever Regulations) that prohibit the feeding of raw waste. At points of entry into the country, non-permitted products are quarantined, confiscated and destroyed. However, there is no formal requirement for truck washing and disinfection, although some commercial farms implement biosecurity measures voluntarily.
Regulations	Adequate legislative framework	10	Regulations prohibit feeding raw feed to pigs. Commercial operations use formulated feed and trucks are not allowed on the premises. Producers pick up feed at the farm gate.
Regulations	Adequate legislative framework	18	A legislative framework exists, granting sufficient authority to the veterinary authority, including support from police and military if necessary.
Regulations	Adequate legislative framework	18	Regulations currently prohibit the importation of raw pork products through ports, particularly those originating from the Dominican Republic.
Regulations	Inadequate legislative framework	4	Not very specific. General sanitary measures.
Regulations	Inadequate legislative framework	5	Animal Health Act in place, but there are still political hurdles to pass before action
Regulations	Inadequate legislative framework	6	There is an updated legislative framework that includes measures related to ASF, but specific legislation is lacking for certain actions, such as the culling of suspect animals.
Regulations	Inadequate legislative framework	6	Regulations include a ban on feeding raw waste and import restrictions, but no truck disinfection requirements. There are also quarantine and animal health certification protocols.
Regulations	Inadequate legislative framework	7	There are resolutions and a regulatory framework, but the lack of resources makes implementation difficult
Regulations	Inadequate legislative framework	10	However, there is no formal requirement for truck washing and disinfection, although some commercial farms implement biosecurity measures voluntarily.
Regulations	Inadequate legislative framework	13	There are some local and [foreign authority] legislation.
Regulations	Inadequate legislative framework	13	No in place regulations
Regulations	Inadequate legislative framework	13	There are no feed regulations.
Regulations	Inadequate legislative framework	14	There is some framework that could encompass ASF
Regulations	Inadequate legislative framework	15	No regulation on waste feeding or truck disinfection.
Regulations	Inadequate legislative framework	15	No legal framework; no CVO role established.
Regulations	Inadequate legislative framework	15	No consistent regulation; signage is informally used during ASF outbreaks in the Dominican Republic to discourage travelers from bringing pork into the country.
Regulations	Inadequate legislative framework	16	In place, needs updating
Regulations	Inadequate legislative framework	16	2/3 of farms are confinement, but no legislation on free-range farming is in place
Regulations	Inadequate legislative framework	17	There is an incomplete legislation, and very limited enforcing capacity
Regulations	Inadequate legislative framework	17	There is no enforcement
Regulations	Inadequate legislative framework	18	However, there are no regulations in place regarding the feeding of raw waste or mandatory disinfection of transport vehicles.
Regulations	Inadequate legislative framework	18	Regulations for waste feeding and mandatory truck cleaning are absent, and no standard practices currently exist regarding waste feed prevention or truck sanitation.
Regulations	Inadequate legislative framework	18	Registration is legally required for all farms, including location and livestock type. However, compliance is inconsistent, and many farmers register only when needing government assistance.

## Sheet: Resources
SUBTHEME	CODE	TERRITORY	COMMENT
Funding and Supplies	Insufficient	1	Insufficient resources for primary prevention (entry points). Sufficient for surveillance
Funding and Supplies	Insufficient	2	Obtaining resources in case of emergencies is delayed
Funding and Supplies	Insufficient	5	Budget limitations specially in absence of disease
Funding and Supplies	Insufficient	5	No enough supplies for outbreak investigation or surveillance.
Funding and Supplies	Insufficient	6	There are limited funds allocated to veterinary services, supplemented by NGO support. However, the lack of proactive actions makes these funds insufficient.
Funding and Supplies	Insufficient	6	The laboratories are underfunded. There is one central laboratory and three regional ones, but they are not fully operational.
Funding and Supplies	Insufficient	6	Supplies are inventoried, but they are not sufficient to deal with large-scale emergencies.
Funding and Supplies	Insufficient	7	There are resolutions and a regulatory framework, but the lack of resources makes implementation difficult
Funding and Supplies	Insufficient	8	They currently operate with a smaller budget than in previous years.
Funding and Supplies	Insufficient	10	It is estimated that the available budget covers around 35-40% of the needs.
Funding and Supplies	Insufficient	10	The laboratory has the equipment and trained personnel for initial detection. However, large-scale containment would be complicated by space and resource limitations. There is only one central laboratory in the country, which limits the ability to respond to a significant increase in demand for testing.
Funding and Supplies	Insufficient	10	In the current situation, resources are adequate for routine surveillance, but in the event of a major outbreak, they would not be sufficient. Protocols are in place, but the capacity to respond to a major emergency is limited.
Funding and Supplies	Insufficient	11	In general, resources are available, but sometimes they are not used properly.
Funding and Supplies	Insufficient	13	In case of an event, there are son resources.
Funding and Supplies	Insufficient	14	No, they have the normal PPE but nothing more than that.
Funding and Supplies	Insufficient	15	No dedicated funding; infrastructure not established.
Funding and Supplies	Insufficient	15	There is a complete lack of supplies, resources, and personnel.
Funding and Supplies	Insufficient	17	No, not enough resources. Very limited personnel
Funding and Supplies	Insufficient	17	No dedicated budget, but there are emergency funds (not 100% sure).
Funding and Supplies	Insufficient	17	There is some level of PPE
Funding and Supplies	Insufficient	18	Funds are inadequate for effectively implementing necessary measures. There is no overtime payment, limiting availability and response capacity during emergencies.
Funding and Supplies	Insufficient	18	Supplies and resources are severely lacking. The system currently emphasizes prevention rather than outbreak response. Existing measures include only basic zoning and compartmentalization plans, with culling of infected animals as the primary action if ASF is introduced
Funding and Supplies	Sufficient	6	FAO, OIRSA and USAID provide financial support, training and monitoring to the swine sector.
Funding and Supplies	Sufficient	11	In general, resources are available, but sometimes they are not used properly.
Funding and Supplies	Sufficient	13	There are disposable material materials.
Lab capacity	Fully equipped	8	The official laboratory has some shortcomings, however, the official university laboratory is quite well equipped.
Lab capacity	Fully equipped	10	Passive surveillance is in place: when swine health problems are reported, samples are taken and analysed for ASF and CSF. A diagnostic laboratory and trained personnel are available in [territory]. The frequency of notifications varies (about once a month, sometimes more). Sometimes other problems unrelated to ASF are detected. This surveillance allows for early detection of suspicious signs.
Lab capacity	Fully equipped	10	The laboratory has the equipment and trained personnel for initial detection. However, large-scale containment would be complicated by space and resource limitations. There is only one central laboratory in the country, which limits the ability to respond to a significant increase in demand for testing.
Lab capacity	Fully equipped	11	There are 2 PCR labs in the central one only. ELISA in the other one. We have limited funds and it will depend on the magnitude of the outbreak.
Lab capacity	Fully equipped	12	The lab is equipped and supplied by USDA. They also send personnel to train
Lab capacity	Unequipped or no lab	5	There is no laboratory in the country
Lab capacity	Unequipped or no lab	6	Diagnostic tools are lacking for all differential diagnoses. Although clinical signs are understood, fear of reporting persists.
Lab capacity	Unequipped or no lab	6	The laboratories are underfunded. There is one central laboratory and three regional ones, but they are not fully operational.
Lab capacity	Unequipped or no lab	7	ELISA only, no PCR. Samples sent to [territory]
Lab capacity	Unequipped or no lab	8	The official laboratory has some shortcomings, however, the official university laboratory is quite well equipped.
Lab capacity	Unequipped or no lab	9	1 central lab is the only one that diagnoses ASF
Lab capacity	Unequipped or no lab	10	The laboratory has the equipment and trained personnel for initial detection. However, large-scale containment would be complicated by space and resource limitations. There is only one central laboratory in the country, which limits the ability to respond to a significant increase in demand for testing.
Lab capacity	Unequipped or no lab	11	There are 2 PCR labs in the central one only. ELISA in the other one. We have limited funds and it will depend on the magnitude of the outbreak.
Lab capacity	Unequipped or no lab	13	There is no laboratory capacity
Lab capacity	Unequipped or no lab	14	There is no Dx laboratory. The nearest unit should be in [territory] (in dvelopment)
Lab capacity	Unequipped or no lab	15	Samples are rarely collected; passive surveillance is weak, and if something is suspected, samples must be sent to Plum Island for testing.
Lab capacity	Unequipped or no lab	15	Lab support lacking; no local diagnostics.
Lab capacity	Unequipped or no lab	17	There is no laboratory capacity on island.
Lab capacity	Unequipped or no lab	18	No diagnostic laboratory facilities are available within the country.
Lab capacity	Unequipped or no lab	18	No passive surveillance is conducted regularly. Suspicious samples, if found, are sent to laboratories in Plum Island or Kansas State University.
Staffing	Adequate		(NO RESPONSES)
Staffing	Understaffed	1	High turnover of SVO staff (high proportion of contracted personnel not renewed). Private vets are not authorised to act in emergencies. Staff availability varies by region.
Staffing	Understaffed	4	One vet, 1 ext officer
Staffing	Understaffed	5	Not enough staff, but there is access to material to respond. Prevention measures are in place
Staffing	Understaffed	6	There is staff nationwide, but it has been significantly reduced due to voluntary retirement decrees. Veterinary services are understaffed, although they are trained and receive regular updates on ASF.
Staffing	Understaffed	10	The existing staff is trained, but insufficient. There are currently approximately 2 (4 in total in the agency) field veterinarians, with the estimated need for 8 to 10 veterinarians to cover the expanding pig population. There is potential for growth, so it is important to prepare in advance. Available technicians provide support, but the number of professionals needs to be increased.
Staffing	Understaffed	10	There are few private veterinarians (about 2 consultants) working with the livestock sector. In the public sector, about 4 [animal health association] veterinarians cover the field. Most producers know that they should report suspicious clinical signs or increased mortality. However, the lack of sufficient veterinary staff in the field can limit the ability to respond immediately.
Staffing	Understaffed	11	More staff and more training are required. Mainly the private ones
Staffing	Understaffed	12	There is a lack of public and private personnel. Ther
Staffing	Understaffed	13	Only the CVO, starting feb 2025 she's getting vet tech and then an extension officer
Staffing	Understaffed	15	No legal framework; no CVO role established.
Staffing	Understaffed	15	Unpaid veterinarian consoultant to the government.
Staffing	Understaffed	15	There is a complete lack of supplies, resources, and personnel.
Staffing	Understaffed	16	Staff is trained, but insufficient
Staffing	Understaffed	17	No, not enough resources. Very limited personnel
Staffing	Understaffed	18	There are only 4 veterinarians available nationwide, which is insufficient. Ideally, there should be at least 7 veterinarians.
Training	Insufficient training of lab or vet personnel	7	some training in ASF is lacking
Training	Insufficient training of lab or vet personnel	11	More staff and more training are required. Mainly the private ones
Training	Insufficient training of lab or vet personnel	11	Improve the training of inspectors to identify red diseases
Training	Insufficient training of lab or vet personnel	12	There is a lack of public and private personnel. There is a lack of training
Training	Insufficient training of lab or vet personnel	14	there is training for disastres but not ASF specific
Training	Insufficient training of lab or vet personnel	15	Inexistent
Training	Sufficient training of lab or vet personnel	4	Vet has been trained. Farmers are likely to report to vet services.
Training	Sufficient training of lab or vet personnel	6	Veterinary services are understaffed, although they are trained and receive regular updates on ASF.
Training	Sufficient training of lab or vet personnel	6	FAO, OIRSA and USAID provide financial support, training and monitoring to the swine sector.
Training	Sufficient training of lab or vet personnel	8	[animal health association], which was born from outbreaks of CSF in [territory] in 2011, has received extensive training.
Training	Sufficient training of lab or vet personnel	10	The laboratory has the equipment and trained personnel for initial detection. However, large-scale containment would be complicated by space and resource limitations. There is only one central laboratory in the country, which limits the ability to respond to a significant increase in demand for testing.
Training	Sufficient training of lab or vet personnel	10	The existing staff is trained, but insufficient. There are currently approximately 2 (4 in total in the agency) field veterinarians, with the estimated need for 8 to 10 veterinarians to cover the expanding pig population. There is potential for growth, so it is important to prepare in advance. Available technicians provide support, but the number of professionals needs to be increased.
Training	Sufficient training of lab or vet personnel	13	The CVO is trained, reporting will be back to the VO in the [territory]. Th
Training	Sufficient training of lab or vet personnel	14	The vets know. Farmers tend to report anything susopicious to the vet authorities.
Training	Sufficient training of lab or vet personnel	16	Staff is trained, but insufficient
Training	Sufficient training of lab or vet personnel	16	Vets are trained, farmers are not
Training	Sufficient training of lab or vet personnel	17	The 2 vets are well trainers
Training	Sufficient training of lab or vet personnel	18	Slaughterhouses conduct both ante- and post-mortem inspections carried out by trained technicians who are capable of identifying abnormalities or diseases.
Training	Sufficient training of lab or vet personnel	18	Veterinarians and technicians are trained in ASF detection and response

## Sheet: Surveillance
SUBTHEME	CODE	TERRITORY	COMMENT
Differentials	Not present	6	If there are PPA spreads in the country (Aujesky, CSF, PRRS, Haemophilus, etc.)
Differentials	Not present	7	there is no CSF
Differentials	Not present	13	Those diseases are not there, but this is an assumption based on no massive mortality events.
Differentials	Not present	14	There are no differentials on island
Differentials	Not present	15	No known endemic differential diseases.
Differentials	Not present	17	There are no differntial ds on island
Differentials	Not present	18	No other diseases of differential diagnosis relevance are present in the country.
Differentials	Present	2	many confusing diseases, except CSF
Differentials	Present	3	768 suspected cases of pig erythrocyte disease in the last year
Differentials	Present	8	Since 2016 they have declared themselves free of CSF, but international recognition from the WOAH is lacking.
Differentials	Present	10	There are no reports of CSF or ASF in the country. However, erysipelas has been detected and PRRS is not present according to available information.
Differentials	Present	11	CSF
Differentials	Present	13	Those diseases are not there, but this is an assumption based on no massive mortality events.
Slaughter	No informal slaughter reported	4	There is well established protocol for pre slaughter inspection, notifying the manager and then the farmers.
Slaughter	No informal slaughter reported	5	There is extension officer for ante morten and Public Health worker will check post mortem
Slaughter	No informal slaughter reported	14	There is an abattoir with health inspectors that perform pre and post inspection.
Slaughter	No informal slaughter reported	18	Slaughterhouses conduct both ante- and post-mortem inspections carried out by trained technicians who are capable of identifying abnormalities or diseases.
Slaughter	Only informal slaughter	15	No formal slaughter; no inspections conducted.
Slaughter	Some formal or regulated	1	There is still a lot of informality at the local level.
Slaughter	Some formal or regulated	4	There is well established protocol for pre slaughter inspection, notifying the manager and then the farmers.
Slaughter	Some formal or regulated	6	There are formal slaughterhouses with trained inspectors, but many informal slaughterhouses still operate. FAO has supported improved reporting and access to information.
Slaughter	Some formal or regulated	8	There are qualified personnel in certified slaughterhouses, however, there are a large number of informal slaughterhouses.
Slaughter	Some formal or regulated	10	Commercial slaughterhouses are officially inspected by [animal health authority]. Staff are trained to identify abnormalities, which are reported to the authority. However, in informal slaughterhouses there is no certainty that they are fully prepared to specifically recognise exotic diseases such as ASF.
Slaughter	Some formal or regulated	14	There is an abattoir with health inspectors that perform pre and post inspection.
Slaughter	Some formal or regulated	17	There is a slaughter facility/butcher station. Different countainers fullfilling different roles. They are lacking a proper slaughter facility. The is a cooling facility, to process and store. There is ante and post-mortem inspection done by state vet, for both commercial and feral animal. It si also common practice to slaugher in their house and then bring the animals to the butcher station.
Slaughter	Some formal or regulated	18	Slaughterhouses conduct both ante- and post-mortem inspections carried out by trained technicians who are capable of identifying abnormalities or diseases.
Slaughter	Some informal slaughter	1	There is still a lot of informality at the local level.
Slaughter	Some informal slaughter	3	A lot of slaughter without inspection. Slaughterhouses that do not meet minimum conditions. It is the responsibility of public health
Slaughter	Some informal slaughter	6	Informal markets and clandestine slaughterhouses are recurring challenges.
Slaughter	Some informal slaughter	6	There are formal slaughterhouses with trained inspectors, but many informal slaughterhouses still operate. FAO has supported improved reporting and access to information.
Slaughter	Some informal slaughter	8	There are qualified personnel in certified slaughterhouses, however, there are a large number of informal slaughterhouses.
Slaughter	Some informal slaughter	10	Commercial slaughterhouses are officially inspected by [animal health authority]. Staff are trained to identify abnormalities, which are reported to the authority. However, in informal slaughterhouses there is no certainty that they are fully prepared to specifically recognise exotic diseases such as ASF.
Slaughter	Some informal slaughter	17	There is a slaughter facility/butcher station. Different countainers fullfilling different roles. They are lacking a proper slaughter facility. The is a cooling facility, to process and store. There is ante and post-mortem inspection done by state vet, for both commercial and feral animal. It si also common practice to slaugher in their house and then bring the animals to the butcher station.
Surveillance	Appropriate and sufficient	5	There is extension officer for ante morten and Public Health worker will check post mortem
Surveillance	Appropriate and sufficient	6	Surveillance plans are coordinated, including mandatory reporting, and agricultural organisations are actively involved in the response.
Surveillance	Appropriate and sufficient	6	Surveillance focuses on informal markets and border areas, identified as high-risk areas.
Surveillance	Appropriate and sufficient	8	Passive surveillance is being carried out. Risk-based surveillance is lacking.
Surveillance	Appropriate and sufficient	10	Passive surveillance is in place: when swine health problems are reported, samples are taken and analysed for ASF and CSF. A diagnostic laboratory and trained personnel are available in [territory]. The frequency of notifications varies (about once a month, sometimes more). Sometimes other problems unrelated to ASF are detected. This surveillance allows for early detection of suspicious signs.
Surveillance	Appropriate and sufficient	10	There are populations identified as high risk, especially in border areas with [neighboring territory]. Although a new risk analysis would probably not significantly change the priority areas, the populations are already defined and receive regular sampling.
Surveillance	Appropriate and sufficient	14	There is inspection of pigs products that come in.
Surveillance	Insufficient or no surveillance	1	Large producers report little
Surveillance	Insufficient or no surveillance	2	pigs near borders and airports and garbage dumps
Surveillance	Insufficient or no surveillance	2	underreporting
Surveillance	Insufficient or no surveillance	6	Surveillance focuses on informal markets and border areas, identified as high-risk areas.
Surveillance	Insufficient or no surveillance	6	This issue is under the jurisdiction of the [department of environment], but no recent requests for monitoring have been made.
Surveillance	Insufficient or no surveillance	7	few notifications
Surveillance	Insufficient or no surveillance	8	Although they have agricultural protection services SEPA-OIRSA, their borders are very porous.
Surveillance	Insufficient or no surveillance	8	Passive surveillance is being carried out. Risk-based surveillance is lacking.
Surveillance	Insufficient or no surveillance	10	There is some passive and sporadic surveillance through NGOs and in zoo areas where there are peccaries. However, there is no regular and systematic program focused on wild populations.
Surveillance	Insufficient or no surveillance	12	A surveillance structure is in place and if we suspect disease, we will send a vet team to collect samples at the farm. Those samples may come back to lab for testing or be sent abroad. Testing is not always done at the lab. For past two years we have not received a lot of samples of suspicious cases i.e. specifically possible ASF cases. Because of the PRRS outbreak last year, all samples would r…
Surveillance	Insufficient or no surveillance	12	Notification needs to be improved. By suspending compensation, reporting was significantly reduced.
Surveillance	Insufficient or no surveillance	12	Border area is high risk
Surveillance	Insufficient or no surveillance	13	None done yet, but it has been discussed.
Surveillance	Insufficient or no surveillance	14	No
Surveillance	Insufficient or no surveillance	15	High-risk populations not identified or monitored.
Surveillance	Insufficient or no surveillance	15	Inexistent
Surveillance	Insufficient or no surveillance	15	Samples are rarely collected; passive surveillance is weak, and if something is suspected, samples must be sent to Plum Island for testing.
Surveillance	Insufficient or no surveillance	15	Wild boar surveillance not conducted.
Surveillance	Insufficient or no surveillance	17	No
Surveillance	Insufficient or no surveillance	18	No passive surveillance is conducted regularly. Suspicious samples, if found, are sent to laboratories in Plum Island or Kansas State University.
Surveillance	Insufficient or no surveillance	18	No specific risk-based surveillance is implemented.
Surveillance	Insufficient or no surveillance	18	No surveillance activities are conducted for wild pig populations.

## Sheet: Traceability
SUBTHEME	CODE	TERRITORY	COMMENT
Traceability	Live pigs	1	Pigs identified with tags																																				Name: Live animals
Traceability	Live pigs	1	To move animals, a mobilization guide is required.
Traceability	Live pigs	2	There is traceability of live pigs, not of products
Traceability	Live pigs	4	There is traceability from the abattoir. There is no tracing for other movements that do not involved the slaughterhouse.
Traceability	Live pigs	6	There is a traceability system provided by OIRSA, but it is outdated and has limited use. Progress has been made in tracking movements between farms.
Traceability	Live pigs	8	Traceability exists for live animals and pork products originating from certified slaughterhouses.
Traceability	Live pigs	12	transport guide
Traceability	Live pigs	17	Animals that enter the burcher station is entered in a database. At the moment is only for goats and pigs. This is linked to the butcher facility.
Traceability	Live pigs	18	Information is available only at slaughterhouses regarding the origin of pigs arriving for slaughter.
Traceability	No live animal	4	There is traceability from the abattoir. There is no tracing for other movements that do not involved the slaughterhouse.
Traceability	No live animal	14	No, pigs are not tagged or identified. The name of the farm is linked with pig production.
Traceability	No pork products	2	There is traceability of live pigs, not of products
Traceability	No system	3	Notice of pig transfer, but not mandatory
Traceability	No system	6	There is a traceability system provided by OIRSA, but it is outdated and has limited use.
Traceability	No system	10	Although the movements are known, identification and traceability are not fully developed. There is no system that integrates all the information in a fluid manner. Control is kept on imports of genetic material, but there is no comprehensive traceability of the pig sector.
Traceability	No system	15	No traceability systems in place.
Traceability	No system	18	Traceability systems are limited, existing only for imported semen, which follows procedures overseen by veterinary technicians upon arrival. There is no traceability for live pigs or pork products.
Traceability	Pork products	8	Traceability exists for live animals and pork products originating from certified slaughterhouses.
Traceability	Pork products	17	Animals that enter the burcher station is entered in a database. At the moment is only for goats and pigs. This is linked to the butcher facility.
Traceability	Pork products	18	Traceability systems are limited, existing only for imported semen, which follows procedures overseen by veterinary technicians upon arrival. There is no traceability for live pigs or pork products.

## Sheet: No theme
SUBTHEME	CODE	TERRITORY	COMMENT
		8	There are peccaries, more information is needed.
		8	Peccaries remain to be considered.

## Sheet: Data Dictionary and Comments
Theme	The overall theme identified through coding of responses
Subtheme	Codes that emerged as themes fitting within an overall theme
Territory	The territory code assigned to the territory that provided the comments
Comment	The textual comment provided by the territory
Note:	Not all territories provided comments to all questions. Some were more comprehensive in their answers. Comments were coded to all applicable codes, and were evaluated using both the provided comments and the statement to which the comment was provided as an answer. For example, a comment stating simply, "none" was evaluated with the associated statement, which may have been about the characteriza…
