# Supplementary material for: Beneath the surface: A survey evaluating ASF preparedness across the Caribbean and Latin America
Source: Research Square preprint supplement (doi:10.21203/rs.3.rs-8262911/v1), 2026-02-03
Supplement: Supplementary file 3 [file 5fe9f58cf45cba45eb792b23.xlsx]

## Sheet: Sheet1
Question	1	2	3	4	5	6	7	8	9	10	11	12	13	14	15	16	17	18	19	20	21	22	23	24	25	26	27	28	29	30
Text	There is sufficient staff at the national level (central, regional, and local) to carry out prevention and response activities for ASF, and the personnel are trained and qualified.	There are sufficient funds available to carry out prevention, detection, notification, and mitigation measures.	There is good communication and predefined coordination mechanisms for public-private partnerships and within the government (border control, etc.) to support detection and response.	There is a legislative framework that grants sufficient authority to the veterinary authority to enact the required measures and provide adequate support.	The private pig industry is positive and receptive to the ASF control measures enacted by the Veterinary Authority.	Pig producers are classified into categories (e.g., highly technical commercial, small commercial, subsistence) based on defined criteria.	Commercial pig producers are registered, and their location and pig stocks are known.	Pig movement patterns have been studied and characterized.	The backyard pig population (number and geographical distribution) has been studied and characterized.	The population of wild boars and feral pigs in the country has been studied and characterized.	Pigs are slaughtered in formal slaughterhouses with official inspection. Inspectors are well-qualified to identify and detect the disease.	There is a traceability system that allows for forward and backward tracking of live pigs, pork products, and germplasm.	There are existing regulations aimed at preventing/controlling pig diseases, such as the prohibition of feeding pigs raw waste, the prohibition of bringing raw pork products into the country in luggage, mandatory washing/disinfection of live pig transport trucks, etc.	Non-governmental institutions or groups collaborate with the government to support the pig production sector.	There is a national ASF prevention/control plan. There is a national focal point dedicated to ASF and a national committee or working group on the disease, made up of trained and qualified individuals to create and carry out ASF response measures.	A risk analysis has been carried out for the country, high-risk pathways have been identified, and mitigation measures have been designed and implemented based on this analysis.	A contingency plan exists to respond to an ASF emergency, which has been tested in at least one simulation exercise.	Appropriate passive surveillance is carried out, including the collection and sending of suitable samples. When responding, the number of reported suspicions, the samples collected, the availability of diagnostic material, trained personnel, and the possibility of performing differential diagnoses must be considered.	Surveillance activities regularly include the country's wild boar and feral pig populations.	The diagnostic laboratory is well-equipped, the staff is trained, and there are sufficient funds to support early detection and subsequent containment.	High-risk populations are identified, and specific, risk-based surveillance is periodically carried out in these populations.	A communication plan exists to alert producers about ASF risks and detections.	Farmers and veterinarians (private and public) are well-trained to detect and respond to ASF and commonly report suspicious clinical signs/mortality to the Veterinary Authority for investigation.	Other pig diseases that are differential diagnoses for ASF are not present in the country.	A communication plan is in place and used to alert travelers about the risks of ASF introduction.	There are sufficient supplies and resources for the personnel investigating outbreaks and conducting surveillance to achieve proper disinfection and biosecurity between farms. Procedures are described and followed to prevent the spread between farms where outbreaks occur.	Biosecurity practices are common. The industry is organized and professional.	In the country, feeding pigs with waste is not practiced and/or there are specific regulations for food treatment. Farms using trucks to transport food adequately disinfect and wash the trucks before they enter the farm.	Farms are mainly confinement operations, and free-range pig farming is not allowed. Backyard pigs are adequately contained with fencing.	The Veterinary Authority operates a system to collect information on outbreaks and produce timely reports and alerts on reportable and significant diseases, and disease reports and alerts are made available to the public.
1	High turnover of SVO staff (high proportion of contracted personnel not renewed). Private vets are not authorised to act in emergencies. Staff availability varies by region.	Insufficient resources for primary prevention (entry points). Sufficient for surveillance	Some difficulty in coordinating with customs authorities.			5 categories, depending on the number of fattening pigs or the number of mother sows	Pigs identified with tags	To move animals, a mobilization guide is required.		There are no wild boars. They have studied the behavior and distribution of feral pigs	There is still a lot of informality at the local level.							Large producers report little		only PCR
2		Obtaining resources in case of emergencies is delayed	There are links, but not formal ones							only on Cocos Island		There is traceability of live pigs, not of products		international organizations and the chamber of commercial pig producers	Stakeholders are not involved in drafting resolutions	Higher risk entry routes were identified, but mitigation measures were not implemented		underreporting			pigs near borders and airports and garbage dumps	We don't reach the backyard ones	underreporting	many confusing diseases, except CSF			on medium and large farms		There are indigenous areas that raise pigs in freedom (limited)
3										[environment and natural resources department]. Feral pigs are limited in the northern states. There are no wild boars in the wild.		Notice of pig transfer, but not mandatory			Working group on swine health, made up of different sectors			768 suspected cases of pig erythrocyte disease in the last year									Biosecurity is not mandatory.
4	One vet, 1 ext officer		There is a comms unit at the department that coordinates local and federal comms	Animal health act was passed this year 2024. There is also a Veterinary Act and a Animal Control Act.	Industryu seems receptive to ASF related activities	No formal documentation of this.	Lacking a formal database	They usually move from farm to abattoir, sometimes will move the sows for breeding. Also trade among farms.		Not studied. Some hunters go for them.	There is well established protocol for pre slaughter inspection, notifying the manager and then the farmers.	There is traceability from the abattoir. There is no tracing for other movements that do not involved the slaughterhouse.	Not very specific. General sanitary measures.	Nothing specific to pig production	nothing now, but it is on the works (coming soon)	We did an examplary RA in a Workshop in Nov 2023	Simulation is coming in 2025, first half.					We can get the message across in case of an event, but there is no formal plan.	Vet has been trained. Farmers are likely to report to vet services.							If there is any outbreak or concern, the Vet Services would produce monthly reports. We don't collect the information. More a sort of passive information gathering.
5	Not enough staff, but there is access to material to respond. Prevention measures are in place	Budget limitations specially in absence of disease	There are good communication with instututions, but farmers are harder to get	Animal Health Act in place, but there are still political hurdles to pass before action	Still challenges with producers	Based on numbers, yes		To some extent there has been studied. Minimal formal research though.		Only feral pigs, there are known areas where feral pig lives and a feral animal control program	There is extension officer for ante morten and Public Health worker will check post mortem		Airport controls and general pig health programs are in place	Mainly with [university], no local pig association.	There is a general response plan.	There has been an internal Risk Analysis, identified risk routes (like planes from DR). Some mitigation measures are in place.				There is no laboratory in the country		There is a dept dedicated Facebook page, there is a media communications team.	Vet services receive calls from farmers when something looks oddd.		There information in the FB page.	No enough supplies for outbreak investigation or surveillance.		Abattori trucks are disinfected, also trucks of larger companies are disinfected too.	Most farms have contained pigs	Through the media
6	There is staff nationwide, but it has been significantly reduced due to voluntary retirement decrees. Veterinary services are understaffed, although they are trained and receive regular updates on ASF.	There are limited funds allocated to veterinary services, supplemented by NGO support. However, the lack of proactive actions makes these funds insufficient.	There is interaction with organisations through open communication channels. Surveillance plans are coordinated, including mandatory reporting, and agricultural organisations are actively involved in the response.	There is an updated legislative framework that includes measures related to ASF, but specific legislation is lacking for certain actions, such as the culling of suspect animals.	Although there is communication with the veterinary authority, some producers are reluctant to report suspected cases. Some of the sector invests in biosecurity, while others have limited interest.	There is no defined criterion. Backyard pigs predominate due to the distribution of the population. The last census was in 2008, and another is expected to be carried out next year.	Commercial producers are registered and maintain a database that includes pig locations and inventories.	Commercial pig movement patterns are well defined, but there is insufficient information on backyard or subsistence pigs. Informal markets and clandestine slaughterhouses are recurring challenges.	In 2022, a survey of backyard pigs was carried out, but the data has not been updated. The population fluctuates constantly, making it difficult to characterize.	There is no data available on the existence of feral pigs or wild boars in the country. This issue is the responsibility of the [environment and natural resources department]	There are formal slaughterhouses with trained inspectors, but many informal slaughterhouses still operate. FAO has supported improved reporting and access to information.	There is a traceability system provided by OIRSA, but it is outdated and has limited use. Progress has been made in tracking movements between farms.	Regulations include a ban on feeding raw waste and import restrictions, but no truck disinfection requirements. There are also quarantine and animal health certification protocols.	FAO, OIRSA and USAID provide financial support, training and monitoring to the swine sector.	There is a plan focused primarily on prevention, passive surveillance and health education, but it lacks integration for a comprehensive response.	OIRSA has led some risk analyses, but these activities are still in the early stages.	A draft contingency plan exists, but it has not been approved or tested through drills.	Diagnostic tools are lacking for all differential diagnoses. Although clinical signs are understood, fear of reporting persists.	This issue is under the jurisdiction of the [department of the environment], but no recent requests for monitoring have been made.	The laboratories are underfunded. There is one central laboratory and three regional ones, but they are not fully operational.	Surveillance focuses on informal markets and border areas, identified as high-risk areas.	Registered producers, mainly in the commercial pig sector, are notified directly.	There are few private veterinarians in the country. Although some producers report suspected cases, most do not.	If there are PPA spreads in the country (Aujesky, CSF, PRRS, Haemophilus, etc.)	Actions are limited to the distribution of leaflets in agricultural quarantine zones.	Supplies are inventoried, but they are not sufficient to deal with large-scale emergencies.	Approximately 50% of the sector practices biosecurity. Financial and infrastructural challenges limit its widespread adoption.	These practices are common in high-tech commercial operations, but not in backyard producers.	Most backyard pigs are confined in small pens, following regulations related to human and environmental health.	There is a system for reporting outbreaks and illnesses, but the information is not publicly available.
7	some training in ASF is lacking			There are resolutions and a regulatory framework, but the lack of resources makes implementation difficult		3 categories: backyard <25; artisanal farms: 25 to 100; semi-technified farms: 100 to 500; commercial farms: >500			80% were backyard pigs in the 2008 census	There are no wild boars				Mainly from international organizations such as OIRSA and FAO				few notifications		ELISA only, no PCR. Samples sent to Guatemala				there is no CSF
8	[agriculture department]'s National Swine Health Program, which was born from outbreaks of CSF in [territory] in 2011, has received extensive training.	They currently operate with a smaller budget than in previous years.	Although they have agricultural protection services SEPA-OIRSA, their borders are very porous.			There are two classifications: farms (technical) and backyard animals, but there are no regulations for this.		Yes, they have maps of the flow of pig movement.	It has been studied, it lacks characterization.	There are peccaries, more information is needed.	There are qualified personnel in certified slaughterhouses, however, there are a large number of informal slaughterhouses.	Traceability exists for live animals and pork products originating from certified slaughterhouses.		The private sector collaborates strongly with the public sector.	There is a plan, it needs to be reviewed.	Pending	At least one drill has been carried out. The contingency plan needs to be reviewed/updated.		There are no wild boars, there are no feral ones. Peccaries remain to be considered.	The official laboratory has some shortcomings, however, the official university laboratory is quite well equipped.	Passive surveillance is being carried out. Risk-based surveillance is lacking.			Since 2016 they have declared themselves free of CSF, but international recognition from [WOAH] is lacking.					Although backyards are the minority, they are generally found loose.	The information is available, however, it is not made available to the public.
9	17 departments, in each one there is at least one vet.					technical, semi-technical and backyard			last census in 2012	There is none				OIRSA, FAO	2020 pig red disease control plan	have not performed AR	[territory]'s contingency plan. OIRSA drill			1 central lab is the only one that diagnoses ASF										They have a system that records surveillance activities and notifications. The data is available to officials, but is not made public.
10	The existing staff is trained, but insufficient. There are currently approximately 2 (4 in total in the agency) field veterinarians, with the estimated need for 8 to 10 veterinarians to cover the expanding pig population. There is potential for growth, so it is important to prepare in advance. Available technicians provide support, but the number of professionals needs to be increased.	Prevention is carried out mainly through technicians and field resources, often with the support of specific projects (for example, OIRSA in 2020). Because there is no export, the importance given to the pig sector is limited. Inputs are received from the International Atomic Energy Agency, maintaining constant communication. It is estimated that the available budget covers around 35-40% of the n…	[animal health authority], as a statutory body independent of the [agriculture department], coordinates with its four departments (Animal Health, Plant Health, Food Safety and Quarantine). There is good relationship and coordination between the various government institutions, as well as increasingly effective communication with producers. The swine industry has a “Pork Consulate” and has partici…	The legal framework is based on the Act that gave rise to [animal health authority] in 2000, updated in 2020, and on secondary legal instruments (regulations and bylaws). [animal health authority] has the authority to regulate and enforce regulations related to PPA and PPC, including the prohibition of feeding raw waste.	Although there were initial disagreements, education and awareness raising have improved the attitude of producers towards surveillance and prevention measures. Commercial producers are more receptive; however, the backyard sector presents greater difficulties, especially in indigenous communities in southern [territory] where pigs are raised free-range. Greater support from the [agriculture depa…	In [territory], there are two main categories: backyard and commercial. Backyard producers raise pigs for family or community consumption, while commercial producers produce for the formal market (slaughterhouses, butcher shops, packing plants). This classification is based on the type of farm and the destination of the production.	There is a food safety system and a business register that provides information on the location of commercial producers. The last official census was conducted in 2023. Most commercial producers participate in this type of register.	Studies have been conducted, the most recent in 2020, which allow us to understand movement patterns. Currently, there are new regulations that facilitate inspection and control of movement between districts, implemented for about a month now. There is a clear understanding of how animals are moved within the country.	Typically, local authorities (mayors, community leaders) and extension workers work together to identify households that breed various species. Through active surveillance, high-risk communities are targeted, especially in border areas with [neighboring territory]. It is estimated that around 70% of the backyard population is known, which allows for a clearer idea of ​​the distribution and number…	There is no systematic information on wild boars or feral pigs. There are only references to the “peccary”, and these studies are usually carried out through NGOs and projects on sustainable resources and climate change.	Commercial slaughterhouses are officially inspected by [animal health authority]. Staff are trained to identify abnormalities, which are reported to the authority. However, in informal slaughterhouses there is no certainty that they are fully prepared to specifically recognise exotic diseases such as ASF.	Although the movements are known, identification and traceability are not fully developed. There is no system that integrates all the information in a fluid manner. Control is kept on imports of genetic material, but there is no comprehensive traceability of the pig sector.	There are regulations issued by [animal health authority] (Swine Fever Regulations) that prohibit the feeding of raw waste. At points of entry into the country, non-permitted products are quarantined, confiscated and destroyed. However, there is no formal requirement for truck washing and disinfection, although some commercial farms implement biosecurity measures voluntarily.	We do not have a communication plan, however, we do have measures that were put in place and utlizied. These measures are in the form of posters. These were distributed to customs, port of entry and relevant stakeholders but we have not seen the posters out anywhere for travellers to read. It is not a simple or quick process to get the posters up. We have to get permission from airport security.	There is a national prevention plan that needs updating. There is a national focal point in transition, but there is no specific committee or working group beyond the Animal Health Department. The current plan is old (2020) and needs to be reviewed and modernized.	A risk analysis was conducted in 2018-2019 and an initial plan was developed based on this. It has not been updated recently. It is considered necessary to review it to improve mitigation measures and expand active surveillance.	There has not been a drill in many years and there is no updated contingency plan. If the PPA were to enter today, there would be no immediate operational plan. A plan is planned to be updated in conjunction with OIRSA, but it is not currently in force.	Passive surveillance is in place: when swine health problems are reported, samples are taken and analysed for ASF and CSF. A diagnostic laboratory and trained personnel are available in [territory]. The frequency of notifications varies (about once a month, sometimes more). Sometimes other problems unrelated to ASF are detected. This surveillance allows for early detection of suspicious signs.	There is some passive and sporadic surveillance through NGOs and in zoo areas where there are peccaries. However, there is no regular and systematic program focused on wild populations.	The laboratory has the equipment and trained personnel for initial detection. However, large-scale containment would be complicated by space and resource limitations. There is only one central laboratory in the country, which limits the ability to respond to a significant increase in demand for testing.	There are populations identified as high risk, especially in border areas with [neighboring territory]. Although a new risk analysis would probably not significantly change the priority areas, the populations are already defined and receive regular sampling.	There is no specific communication plan for PPA, but channels used for other diseases are used. Depending on the target audience, social media, radio, television, press releases and even foot visits in communities with less connectivity are used. The strategy is adapted according to the needs and the audience.	There are few private veterinarians (about 2 consultants) working with the livestock sector. In the public sector, about 4 [animal health authority] veterinarians cover the field. Most producers know that they should report suspicious clinical signs or increased mortality. However, the lack of sufficient veterinary staff in the field can limit the ability to respond immediately.	There are no reports of PPC or ASF in the country. However, erysipelas has been detected and PRRS is not present according to available information.	Communication exists at points of entry (airports) where meat-sniffing dogs are used. However, entry areas are largely privatised, and outside quarantine-controlled areas, communication is less consistent.	In the current situation, resources are adequate for routine surveillance, but in the event of a major outbreak, they would not be sufficient. Protocols are in place, but the capacity to respond to a major emergency is limited.	There are biosecurity measures in place on commercial farms that can be improved. Approximately 60-70% of commercial operations maintain acceptable biosecurity practices. The organization and professionalization of the industry is increasing, although there is still room for improvement.	Regulations prohibit feeding raw feed to pigs. Commercial operations use formulated feed and trucks are not allowed on the premises. Producers pick up feed at the farm gate.	This varies from region to region. In the Toledo district, for example, backyard pigs roam free. In other areas, fences are used. There is no uniform control throughout the country.	There is a well-defined chain of command. Only authorized persons can share information to ensure the veracity of the message. Internal reports are produced weekly and monthly, and WOAH is notified every six months. Press releases are issued when necessary. [animal health authority] generally coordinates with the [government] to disseminate information to the public.
11	More staff and more training are required. Mainly the private ones	Training funds. The pig program does not have its own funds, they are from [external funding source].	Coordination with [health department] is ok. There are 3 pig associations with which it is difficult to coordinate (there are clashes between them)							We don't have	Improve the training of inspectors to identify red diseases			FAO, OIRSA, IICA, private sector	It is coordinated by the head of the swine program	After the OIRSA AR, an AR was carried out in [territory], and based on the results, the Prevention Plan was adjusted.	drill in 2022		We don't have	There are 2 PCR labs in the central one only. ELISA in the other one. We have limited funds and it will depend on the magnitude of the outbreak.				CSF		In general, resources are available, but sometimes they are not used properly.		feeding with waste is exceptional.		Weekly epidemiological bulletin, publicly accessible, for relevant diseases (includes both plagues)
12	There is a lack of public and private personnel. There is a lack of training					technified, semi-technical and backyard				Only wild pigs. Their distribution has not been studied, but it is known that there are not many of them.	A lot of slaughter without inspection. Slaughterhouses that do not meet minimum conditions. It is the responsibility of public health	transport guide		Limited to international organizations FAO, IICA, USDA-APHIS, OIRSA				Notification needs to be improved. By suspending compensation, reporting was significantly reduced.		The lab is equipped and supplied by USDA. They also send personnel to train	Border area is high risk								There are still pigs in garbage dumps, in small proportions	Detected cases are recorded. It is not publicly accessible.
13	Only the CVO, starting feb 2025 she's getting vet tech and then an extension officer	In case of an event, there are son resources.	Comms with customs. Comms are good.	There are some local and [foreign authority] legislation.	Always willing to receive help from the authority.	Working on that, based on number of sows and piglets	All are registered.	have not been studied but we know about them.	There is a mixture between farmers,. All are small.	There are no wild boar or feral pigs		No traceability system in place yet	No in place regulations	There is a farmers association. There are not so pig oriented.	There is none.	There was a RA done, but not implementation.	Not done yet	None done yet, but it has been discussed.	-	There is no laboratory capacity	No	There is no offical plan, but CVO has materials to share with farmers.	The CVO is trained, reporting will be back to the VO in the Netherlands. There is room for more training for stakeholders.	Those diseases are not there, but this is an assumption based on no massive mortality events.	There were actions when the DR outbreak occurred, but it is not active anymore	There are disposable material materials.	They are not organized nor professional.	There are no feed regulations.	Pig operations are all confined.	It has been done before for animal diseases including public statements. Communications are included in the regulations.
14	there is training for disastres but not ASF specific		Good relationship with customs, they notify the team, for example pork from the DR	There is some framework that could encompass ASF	In the past have been very receptive. Nothing in place now	There is an informal classification of pig producers	no commercial	large wild ppn in the exclusion zone	about 10 producers, not studied	not studied	There is an abattoir with health inspectors that perform pre and post inspection.	No, pigs are not tagged or identified. The name of the farm is linked with pig production.	There is inspection of pigs products that come in.		Thy are working on one. Not ready yet,. It also includes Avian influenza	There was one for amblyomma ticks,	No	No	Nothing in the last 10 years, at least for pigs	There is no Dx laboratory. The nearest unit should be in Antigua (in dvelopment)	No	No	The vets know. Farmers tend to report anything susopicious to the vet authorities.	There are no differentials on island	Fliers and announcements on the radios, not specific but in general if something is identified as a ntional threat.	No, they have the normal PPE but nothing more than that.	limited biosecurity, not organized nor profesisonal	They do use trucks and no disinfection. They use carrots, grain. Also have access to restaurants, cafeteria.	Instalations are rusty and old, but pigs are always confined. There are no free range operations
15	Unpaid veterinarian consoultant to the government.	No dedicated funding; infrastructure not established.	No formal coordination	No legal framework; no CVO role established.	There is no communication with the industry	No classification system in place.	Farms not registered; only four known farms.	Movement not studied; very limited movement between farmers	No studies conducted; production is unregulated.	No wild population assessment available.	No formal slaughter; no inspections conducted.	No traceability systems in place.	No consistent regulation; signage is informally used during ASF outbreaks in the Dominican Republic to discourage travelers from bringing pork into the country.	The veterinary consultant and other veterinarians in the country try to collaborate with the government to support the pig sector, although it is nearly nonexistent.	No formal plan or ASF committee exists.	No formal risk analysis or mitigation planning.	No contingency plan tested or in place.	Samples are rarely collected; passive surveillance is weak, and if something is suspected, samples must be sent to Plum Island for testing.	Wild boar surveillance not conducted.	Lab support lacking; no local diagnostics.	High-risk populations not identified or monitored.	No formal communication strategy in place.	Inexistent	No known endemic differential diseases.	Minimal signage at borders only during nearby outbreaks.	There is a complete lack of supplies, resources, and personnel.	Biosecurity practices not standardized.	No regulation on waste feeding or truck disinfection.	Most pigs are free-range; no fencing standards.	No official reporting system or alerts available.
16	Staff is trained, but insufficient		In process	In place, needs updating	Open to discussion and implementing measures, but measures not in place yet	All subsistence farming, no definition	Not registered, but mapping in progress	So informal it is difficult to characterize	In progress					Farmer's association - all farmer's are supposed to be involved in it		In progress							Vets are trained, farmers are not						2/3 of farms are confinement, but no legislation on free-range farming is in place	In progress
17	No, not enough resources. Very limited personnel	No dedicated budget, but there are emergency funds (not 100% sure).	Good communications, but there are challenges in the intergovermental coordination.	There is an incomplete legislation, and very limited enforcing capacity	Everyone has pigs as a side bussines.	No	There is a farm ID system in place, but it is not enforced.	Not to her knowledge	Not to her knowledge. There isa vague idea of the total (small) pig populations	No feral pigs	There is a slaughter facility/butcher station. Different countainers fullfilling different roles. They are lacking a proper slaughter facility. The is a cooling facility, to process and store. There is ante and post-mortem inspection done by state vet, for both commercial and feral animal. It si also common practice to slaugher in their house and then bring the animals to the butcher station.	Animals that enter the burcher station is entered in a database. At the moment is only for goats and pigs. This is linked to the butcher facility.	There is no enforcement		No	No	No	No	There is no surveillance and no feral suids	There is no laboratory capacity on island.			The 2 vets are well trainers, but the is incertainty about the how much knowledge faremrs have	There are no differntial ds on island		There is some level of PPE	There is a [food hygiene] - they work with restaurants. Not a lot done with farmers, the focus is more into the butcher station.		Animals move in their confined area, they are not open to roam freely
18	There are only 4 veterinarians available nationwide, which is insufficient. Ideally, there should be at least 7 veterinarians.	Funds are inadequate for effectively implementing necessary measures. There is no overtime payment, limiting availability and response capacity during emergencies.	Communication between government entities and private farmers is limited. Farmers often expect the government to handle all responsibilities and are reluctant to share farm information, weakening coordination efforts.	A legislative framework exists, granting sufficient authority to the veterinary authority, including support from police and military if necessary.	Efforts are made to inform producers; however, information often is overlooked, forgotten, or insufficiently disseminated.	Classification criteria are partially defined, differentiating primarily between small commercial (more than 10 pigs) and subsistence (10 or fewer pigs). The industry is slowly improving, though highly technical farms are not yet present.	Registration is legally required for all farms, including location and livestock type. However, compliance is inconsistent, and many farmers register only when needing government assistance.	Pig movements between farms are neither recorded nor studied. Information is available only at slaughterhouses regarding the origin of pigs arriving for slaughter.	Backyard pig population data is only available from farms that have voluntarily registered. Comprehensive characterization has not been conducted.	Wild pig populations exist due to escaped domesticated pigs, but no formal studies or population estimates are available.	Slaughterhouses conduct both ante- and post-mortem inspections carried out by trained technicians who are capable of identifying abnormalities or diseases.	Traceability systems are limited, existing only for imported semen, which follows procedures overseen by veterinary technicians upon arrival. There is no traceability for live pigs or pork products.	Regulations currently prohibit the importation of raw pork products through ports, particularly those originating from the Dominican Republic. However, there are no regulations in place regarding the feeding of raw waste or mandatory disinfection of transport vehicles.	Registered farmers receive an identification card, allowing them discounts from private businesses for farm-related supplies and services, representing limited collaboration.	Efforts to develop a comprehensive plan are ongoing. Current measures, including inspections at airports and seaports, particularly from the Dominican Republic, have been effective, carried out by trained personnel.	No risk analysis has been performed.	No contingency plan is currently available; measures in place focus solely on prevention.	No passive surveillance is conducted regularly. Suspicious samples, if found, are sent to laboratories in Plum Island or Kansas State University.	No surveillance activities are conducted for wild pig populations.	No diagnostic laboratory facilities are available within the country.	No specific risk-based surveillance is implemented.	Currently, there is no communication plan in place, although there are future plans to establish one.	Veterinarians and technicians are trained in ASF detection and response, while farmer training is minimal. However, farmers tend to report unusual observations.	No other diseases of differential diagnosis relevance are present in the country.	No traveler-focused communication plan currently exists.	Supplies and resources are severely lacking. The system currently emphasizes prevention rather than outbreak response. Existing measures include only basic zoning and compartmentalization plans, with culling of infected animals as the primary action if ASF is introduced.	Biosecurity measures are virtually nonexistent on farms. Although improvements in farm organization and infrastructure are gradually occurring, overall biosecurity remains poor.	Regulations for waste feeding and mandatory truck cleaning are absent, and no standard practices currently exist regarding waste feed prevention or truck sanitation.	Confinement practices are generally lacking. Backyard pigs frequently roam freely, indicating inadequate fencing and containment practices across farms.	There is no operational system to gather or disseminate disease outbreak information. Efforts to establish such a system are currently underway.
