# Supplementary material for: Beneath the surface: A survey evaluating ASF preparedness across the Caribbean and Latin America
Source: Research Square preprint supplement (doi:10.21203/rs.3.rs-8262911/v1), 2026-02-03
Supplement: Supplementary file 5 [file e348d47193b8cd35d7451a42.xlsx]

## Sheet: Sheet1
COUNTRY	REGION	Resources / Coordination / Operativity					Susceptible Population					Pig Health & ASF Program
		S1	S2	S3	S4	S5	S6	S7	S8	S9	S10	S11	S12	S13	S14	S15	S16	S17	S18	S19	S20	S21	S22	S23	S24	S25	S26	S27	S28	S29	S30
1	CT	5	5	8	9	10	7	8	9	6	8	5	7	4	8	7	8	7	7	6	8	7	6	7	8	5	6	7	4	6	7
2	CT	8	7	5	9	8	7	8	2	5	N/A	8	7	7	7	8	7	7	7	N/A	7	6	6	7	0	5	6	8	6	8	10
3	CT	10	9	10	10	9	9	7	9	7	9	7	7	8	9	9	9	10	9	8	9	9	8	8	0	10	9	7	7	9	9
4	Cari	6	4	8	10	8	5	7	2	0	1	8	7	6	0	2	6	0	0	0	0	0	7	4	10	0	0	1	0	0	6
5	Cari	3	3	6	9	7	10	10	8	3	4	8	1	6	7	3	8	1	1	1	0	2	6	7	10	3	3	3	6	8	9
6	CT	6	4	7	6	6	5	9	5	4	0	5	4	9	9	7	5	1	7	N/A	5	7	7	6	0	0	5	5	2	7	6
7	CT	5	5	7	7	7	7	7	8	7	N/A	5	5	6	8	4	5	6	5	N/A	6	6	6	6	6	6	6	6	7	7	5
8	CT	6	5	5	7	8	7	8	8	7	N/A	5	6	8	8	8	0	8	8	N/A	8	6	8	8	8	7	7	8	8	6	7
9	CT	10	9	10	10	10	10	10	8	8	N/A	8	6	9	8	8	6	9	10	N/A	10	1	8	9	0	8	10	7	9	6	8
10	CT	5	4	7	8	7	7	7	7	7	0	5	3	8	3	7	5	1	9	6	5	9	7	7	0	6	5	7	8	6	7
11	CT	6	6	6	9	7	8	8	8	7	N/A	8	6	8	7	9	9	9	7	N/A	9	9	8	5	0	10	7	5	8	9	7
12	Cari	6	2	5	8	6	10	9	8	7	2	4	3	8	10	9	1	8	6	1	9	6	9	9	1	9	10	7	3	8	9
13	Cari	3	6	7	6	5	5	8	6	6	N/A	8	2	2	6	2	5	2	4	N/A	0	2	4	7	6	6	7	5	5	7	7
14	Cari	0	0	5	6	8	2	N/A	0	1	1	8	1	1	0	3	3	0	0	1	0	0	0	6	10	9	3	1	0	5	6
15	Cari	1	0	0	0	0	0	0	0	0	0	0	0	1	1	0	0	0	1	0	0	0	0	0	0	1	0	0	0	0	0
16	Cari	2	0	2	8	5	0	5	2	0	N/A	0	0	0	5	0	5	0	0	N/A	0	0	0	5	10	0	0	0	0	5	5
17	Cari	3	5	2	3	3	0	0	0	0	N/A	7	8	0	N/A	0	0	0	0	N/A	0	0	0	7	10	0	6	6	0	8	0
18	Cari	6	5	4	8	6	6	6	0	4	0	7	4	4	2	5	0	0	0	0	0	0	0	5	10	0	0	0	0	3	0
