# Supplementary material for: Beneath the surface: A survey evaluating ASF preparedness across the Caribbean and Latin America
Source: Research Square preprint supplement (doi:10.21203/rs.3.rs-8262911/v1), 2026-02-03
Supplement: Supplementary file 6 [file f6369d1a80f3e08176e3e628.xlsx]

## Sheet: Sheet1
Supplemental Table 2
Statements with answers that would be expected to be similar were identified for internal consistency analysis. English and Spanish versions were:
Group 1:
S2: There are sufficient funds available to carry out prevention, detection, notification, and mitigation measures.
S18: Appropriate passive surveillance is carried out, including the collection and sending of suitable samples. When responding, the number of reported suspicions, the samples collected, the availability of diagnostic material, trained personnel, and the possibility of performing differential diagnoses must be considered.
S2: There are sufficient funds available to carry out prevention, detection, notification, and mitigation measures.
S20: The diagnostic laboratory is well-equipped, the staff is trained, and there are sufficient funds to support early detection and subsequent containment.
S2: There are sufficient funds available to carry out prevention, detection, notification, and mitigation measures.
S26: There are sufficient supplies and resources for the personnel investigating outbreaks and conducting surveillance to achieve proper disinfection and biosecurity between farms. Procedures are described and followed to prevent the spread between farms where outbreaks occur.
Group 2:
S1: There is sufficient staff at the national level (central, regional, and local) to carry out prevention and response activities for ASF, and the personnel are trained and qualified.
S18: Appropriate passive surveillance is carried out, including the collection and sending of suitable samples. When responding, the number of reported suspicions, the samples collected, the availability of diagnostic material, trained personnel, and the possibility of performing differential diagnoses must be considered.
Group 3:
S10: The population of wild boars and feral pigs in the country has been studied and characterized.
S19: Surveillance activities regularly include the country's wild boar and feral pig populations.
Group 1:
S2. Hay fondos suficientes disponibles para llevar a cabo medidas de prevención, detección, notificación y mitigación.
S18: Se lleva a cabo una vigilancia pasiva apropiada, que incluye la recolección y el envío de muestras adecuadas. Al responder, se debe tener en cuenta el número de sospechas reportadas, las muestras recolectadas, la disponibilidad de material de diagnóstico y personal capacitado y la posibilidad de realizar diagnósticos diferenciales.
S2. Hay fondos suficientes disponibles para llevar a cabo medidas de prevención, detección, notificación y mitigación.
S20: El laboratorio de diagnóstico está bien equipado, el personal está capacitado y hay fondos suficientes para apoyar la primera detección y la contención posterior.
S2. Hay fondos suficientes disponibles para llevar a cabo medidas de prevención, detección, notificación y mitigación.
S26: Hay suficientes suministros y recursos para el personal que investiga los brotes y realiza la vigilancia para lograr una desinfección y bioseguridad adecuadas entre granjas. Se describen y se siguen los procedimientos para prevenir la propagación entre granjas donde se producen brotes.
Group 2:
S1: Hay suficiente personal a nivel nacional (central, regional y local) para llevar a cabo actividades de prevención y respuesta a la PPA, y el personal está capacitado y calificado.
S18: Se lleva a cabo una vigilancia pasiva apropiada, que incluye la recolección y el envío de muestras adecuadas. Al responder, se debe tener en cuenta el número de sospechas reportadas, las muestras recolectadas, la disponibilidad de material de diagnóstico y personal capacitado y la posibilidad de realizar diagnósticos diferenciales.
Group 3:
S10: La población de jabalíes y cerdos ferales del país ha sido estudiada y caracterizada.
S19: Las actividades de vigilancia incluyen de manera regular a la población de jabalíes y cerdos ferales del país.
